1 **Rala and the exocyst control Pvr trafficking and signaling to ensure**  
2 **lymph gland homeostasis in *Drosophila melanogaster***

3 Helene Knævelsrud<sup>1,2,3,§</sup>, Caroline Baril<sup>1</sup>, Gwenaëlle Gavory<sup>1</sup>, Jorrit M. Enserink<sup>2,3,4</sup>, Marc  
4 Therrien<sup>1,5,§</sup>

5

6 <sup>1</sup>Institute for Research in Immunology and Cancer, Laboratory of Intracellular Signaling,  
7 Université de Montréal. C.P. 6128, Succursale Centre-Ville. Montréal, Québec, Canada, H3C  
8 3J7

9 <sup>2</sup>Department of Molecular Cell Biology, Institute for Cancer Research, Oslo University  
10 Hospital, Oslo, Norway.

11 <sup>3</sup>Centre for Cancer Cell Reprogramming, Institute of Clinical Medicine, Faculty of Medicine,  
12 University of Oslo, Montebello, Norway.

13 <sup>4</sup>Section for Biochemistry and Molecular Biology, The Department of Biosciences, Faculty of  
14 Mathematics and Natural Sciences, University of Oslo, Oslo, Norway.

15 <sup>5</sup>Département de pathologie et de biologie cellulaire, Université de Montréal

16

17 §To whom correspondence should be addressed

18 Helene Knævelsrud

19 Tel.: +47 22 78 19 76

20 Email: [helene.knavelsrud@medisin.uio.no](mailto:helene.knavelsrud@medisin.uio.no)

21 Marc Therrien

22 Tel.: (514) 343-7837

23 Fax.: (514) 343-6843

24 Email : [marc.therrien@umontreal.ca](mailto:marc.therrien@umontreal.ca)

25

26

27

28 Running title: Rala controls *Drosophila* lymph gland development.

29 Key words: Rala, exocyst, hematopoiesis, lymph gland, Pvr

30

31 **Abstract**

32 The balance between hematopoietic progenitors and differentiated hemocytes is finely tuned  
33 during development. In the larval hematopoietic organ of *Drosophila*, called the lymph gland,  
34 the receptor tyrosine kinase Pvr signals from differentiated cells to maintain a pool of  
35 undifferentiated progenitors. However, little is known about the processes that support Pvr  
36 function. The small GTPase Ral is involved in the regulation of several membrane trafficking  
37 events. *Drosophila* has a single Ral protein, Rala, which has been implicated in the  
38 development of various tissues. Here, we investigated the involvement of Rala in the larval  
39 fly hematopoietic system. We discovered that the loss of *Rala* activity phenocopies *Pvr* loss  
40 of function by promoting hemocyte progenitor differentiation. Moreover, using epistasis  
41 analysis, we found that the guanine exchange factor RalGPS lies upstream of Rala in this  
42 event, whereas the exocyst and Rab11 are acting downstream. Strikingly, the loss of Rala  
43 activity leads to a considerable accumulation of Pvr at the plasma membrane, hence  
44 suggesting a trafficking defect and reduced Pvr function. Consistent with this hypothesis,  
45 *Rala* loss of function phenotype in the lymph gland is fully suppressed by constitutive STAT  
46 activity, which normally mediates Pvr function in the lymph gland. Together, our findings  
47 unravel a novel RalGPS-Rala-exocyst-Rab11 axis for the maintenance of lymph gland  
48 homeostasis through Pvr.

49

## 50 **Introduction**

51 Maintaining an appropriate pool of hematopoietic progenitors and avoiding aberrant blood  
52 cell development is crucial for the fitness of an organism. The fruit fly *Drosophila*  
53 *melanogaster* is a genetically tractable model for signaling mechanisms controlling  
54 hematopoiesis (Banerjee, Girard, Goins, & Spratford, 2019). The evolutionary conservation of  
55 several of the signaling pathways and transcription factors underlying the development of its  
56 hematopoietic system also makes this model biomedically relevant (Boulet, Miller, Vandel, &  
57 Waltzer, 2018).

58 *Drosophila* hematopoiesis occurs in embryo and larvae, whereas the existence of  
59 hematopoiesis in adult flies is debated (Letourneau et al., 2016; Sanchez Bosch et al., 2019).  
60 A first wave of hematopoiesis starts with the specification of a group of cells derived from the  
61 head mesoderm anlage that will give rise to circulating hemocytes in the embryo. Later, the  
62 cells giving rise to the larval hematopoietic organ, the lymph gland, are specified from the  
63 cardiogenic mesoderm. The lymph gland consists of a pair of primary lobes and several  
64 secondary lobes aligned along the dorsal vessel. The primary lobe is subdivided into three  
65 compartments: the medullary zone (MZ) primarily composed of progenitor cells, the cortical  
66 zone (CZ) containing differentiated hemocytes and the posterior signaling centre (PSC),  
67 which regulates the balance between the two other compartments. Differentiated hemocytes  
68 (Honti, Csordas, Kurucz, Markus, & Ando, 2014) are mostly plasmatocytes, which  
69 phagocytose dying cells and invading pathogens. There is a small population of crystal cells,  
70 which perform melanization and are involved in wound healing. Specific challenges such as  
71 eggs of parasitic wasps will induce the differentiation of lamellocytes, which are large cells  
72 that work together with crystal cells to encapsulate their targets. The larval lymph gland is  
73 used as a model system to study hematopoietic progenitor balance (Banerjee et al., 2019).  
74 From the late second instar, the PSC secretes both Hh and Pvf1 as signals to maintain  
75 progenitor quiescence (Baldeosingh, Gao, Wu, & Fossett, 2018; Mandal, Martinez-Agosto,  
76 Evans, Hartenstein, & Banerjee, 2007; Mondal et al., 2011). The Hh signal acts on the MZ  
77 (Mandal et al., 2007), whereas Pvf1 is a ligand for the receptor tyrosine kinase (RTK) Pvr in  
78 the CZ to trigger a signaling cascade known as equilibrium signaling (Mondal et al., 2011).  
79 Together, these signaling mechanisms maintain the progenitor cell population.

80 RTK signaling is induced by ligand binding, but the duration and extent of the signal is  
81 regulated by membrane trafficking (Miaczynska, 2013). Membrane trafficking modulates

82 RTK signaling by affecting receptor internalization, by regulation of the balance between  
83 receptor recycling and degradation, as well as by compartmentalization of signals  
84 (Miaczynska, 2013). Many small GTPases are known to orchestrate membrane trafficking  
85 events (Takai, Sasaki, & Matozaki, 2001). Among these, the small GTPase Ral is at the cross-  
86 roads of several membrane trafficking processes, including exocytosis, endocytosis and  
87 autophagy (Gentry, Martin, Reiner, & Der, 2014). Mammals have two Ral genes, *RALA* and  
88 *RALB*, whereas there is a single *Rala* gene in flies. The fly Rala protein is closely related to  
89 both human RalA (72% identity) and RalB (71% identity) (Gentry et al., 2014).

90 Like other small GTPases, Ral activation is regulated by specific guanine nucleotide exchange  
91 factors (GEFs) and GTPase activating proteins (GAPs). In mammals there are two main  
92 classes of RalGEFs, namely, RalGDS, Rgl1, Rgl2 and Rgl3, which contain a Ras Activation  
93 (RA)-domain for direct interaction with active Ras (Ferro & Trabalzini, 2010), and RalGPS1  
94 and RalGPS2, which harbor a pleckstrin homology (PH) domain that interacts with  
95 phosphoinositides (Quilliam, 2006). The single RalGAP is a heterodimer consisting of an  $\alpha$ -  
96 (RalGAP $\alpha$ 1 or RalGAP $\alpha$ 2 in mammals) and a  $\beta$ -subunit (RalGAP $\beta$ ) (X. W. Chen et al., 2011;  
97 Shirakawa et al., 2009). The *D. melanogaster* genome comprises two genes encoding  
98 RalGEFs (FB2020\_02; Thurmond et al., 2018): *Rgl* and the putative RalGEF *CG5522*  
99 (homologous to mammalian *RalGPS* and thus referred to as *RalGPS* hereafter) (Fig. 1A). It  
100 also comprises genes homologous to those encoding the mammalian RalGAP subunits: one  $\alpha$ -  
101 (*CG5521*) and one  $\beta$ -subunit (*CG34408*) (FB2020\_02; Thurmond et al., 2018). The main Ral  
102 effectors that interact with GTP-bound Ral are Exo84 and Sec5 of the exocyst complex and  
103 Rlip/RalBP1 (Gentry et al., 2014). Through its interaction partners, Ral participates in  
104 exocytosis, autophagy, actin cytoskeleton dynamics, endocytosis and gene expression (Gentry  
105 et al., 2014).

106 While there is currently no evidence that a Ras-RalGEF-Ral axis exists in flies, Rala has been  
107 found to act downstream of Rap1 (Carmena, Makarova, & Speicher, 2011; Mirey et al., 2003),  
108 another Ras-like small GTPase primarily known to control cell adhesion (Frische &  
109 Zwartkruis, 2010). Rala has been studied in embryonal development (Holly, Mavor, Zuo, &  
110 Blankenship, 2015) and the development of some fly tissues including eyes, bristles and  
111 wings (Cho & Fischer, 2011; Mirey et al., 2003; Sawamoto et al., 1999), but much is yet to be  
112 learned about the regulation, function and signaling of Rala in flies.

113 In this study, we investigated the role of *Rala* in the larval hematopoietic system as a tool to  
114 address the involvement of membrane trafficking in lymph gland homeostasis. We found that  
115 loss of *Rala* activity phenocopies *Pvr* depletion and results in hemocyte progenitor  
116 differentiation. We mapped the defect to a novel RalGPS-*Rala*-exocyst-Rab11 signaling axis  
117 involved in lymph gland homeostasis impinging on *Pvr* signaling. Impairment of this axis  
118 leads to abnormal accumulation of *Pvr*, suggesting a trafficking defect. Consistently, lymph  
119 gland enlargement by *Rala* loss of function is suppressed by providing constitutive STAT  
120 activity, which normally mediates the progenitor maintenance signaling from *Pvr*. Taken  
121 together, this places membrane trafficking as another level of regulation of hematopoietic  
122 progenitor maintenance.

## 123 **Results**

### 124 ***Perturbation of Rala activity in the hematopoietic system affects lymph gland homeostasis***

125 To study the role of Rala in the hematopoietic system of *D. melanogaster* larvae, we  
126 expressed wild-type (WT), constitutively active (G20V), or dominant negative (S25N) Rala,  
127 or RNAi against Rala in the larval hematopoietic system marked by expression of GFP using  
128 the *hml<sup>A</sup>*-Gal4 driver. The resulting GFP positive cells in the lymph gland define the cortical  
129 zone of the gland, and generally correspond to differentiated plasmatocytes (Jung, Evans,  
130 Uemura, & Banerjee, 2005). Expression of constitutively active Rala in the cortical zone of  
131 the lymph gland marginally increased the number of GFP-positive cells per lymph gland (Fig.  
132 1B-D), whereas expression of dominant negative Rala or RNAi against Rala led to a 3-fold  
133 increase in the number of GFP-positive cells per lymph gland (Fig. 1B-D), where the cortical  
134 zone was enlarged and hemocytes in the secondary lobes also started expressing GFP.  
135 Expression of Rala<sup>WT</sup>, G20V or S25N in the cortical zone of the lymph gland and in  
136 circulating hemocytes was verified by immunostaining, qPCR and western blotting (Fig.  
137 S1A-D). Immunostaining of endogenous Rala was not clear by any antibodies tested, but  
138 depletion of Rala was verified by qPCR from lymph glands (Fig. S1E) and western blotting of  
139 fat body (Fig. S1F). We also determined that *Rala* transcripts are expressed to similar levels  
140 as *rolled/mapk* mRNAs by transcriptome analysis of entire lymph glands (Table S1).

141 As a control, we verified that the increase in GFP-positive hemocytes in the lymph gland  
142 induced by expression of dominant negative Rala<sup>S25N</sup> could be reversed by co-expression of  
143 wildtype Rala (Fig. S2A-C). Similar to dominant negative versions of other small GTPases,  
144 dominant negative Rala<sup>S25N</sup> is thought to titrate out the RalGEF and thereby inhibit the  
145 function of endogenous Rala (Mirey et al., 2003; Powers, O'Neill, & Wigler, 1989). Co-  
146 expression of wild-type Rala probably allows enough Rala molecules to become loaded with  
147 GTP due to the high cellular GTP concentration and thereby perform their endogenous  
148 function. Finally, the increase in GFP-positive hemocytes in the lymph gland upon depletion  
149 of Rala with an shRNA targeting the 3'UTR could be partially rescued by expression of wild-  
150 type Rala (Fig. S2D-F).

151 In terms of development into differentiated hemocytes, expression of Rala<sup>WT</sup>, Rala<sup>G20V</sup> or  
152 Rala<sup>S25N</sup> in the cortical zone did not affect the percentage of Hnt-positive crystal cells per  
153 primary lobe (5-8% per lobe), whereas fewer crystal cells were observed upon Rala depletion  
154 (2.6% per primary lobe) (Fig. S3A). Similarly, no lamellocytes were detected in circulation

155 upon expression of RalaWT, RalaG20V or RalaS25N, but were sometimes observed upon  
 156 Rala depletion (Fig. S3B-B'). Immunostaining against P1 (Nimrod C1 antigen) showed that  
 157 the Hml-positive hemocytes in all genotypes were plasmatocytes, both in circulation and in  
 158 the lymph gland (Fig. S3C, D). Finally, Rala-depleted hemocytes were competent at  
 159 phagocytosis (Fig. S3E). Taken together, this indicates that perturbation of Rala's function in  
 160 the cortical zone of the lymph gland disturbs lymph gland homeostasis and leads to increased  
 161 numbers of differentiated cells in the cortical zone.

162

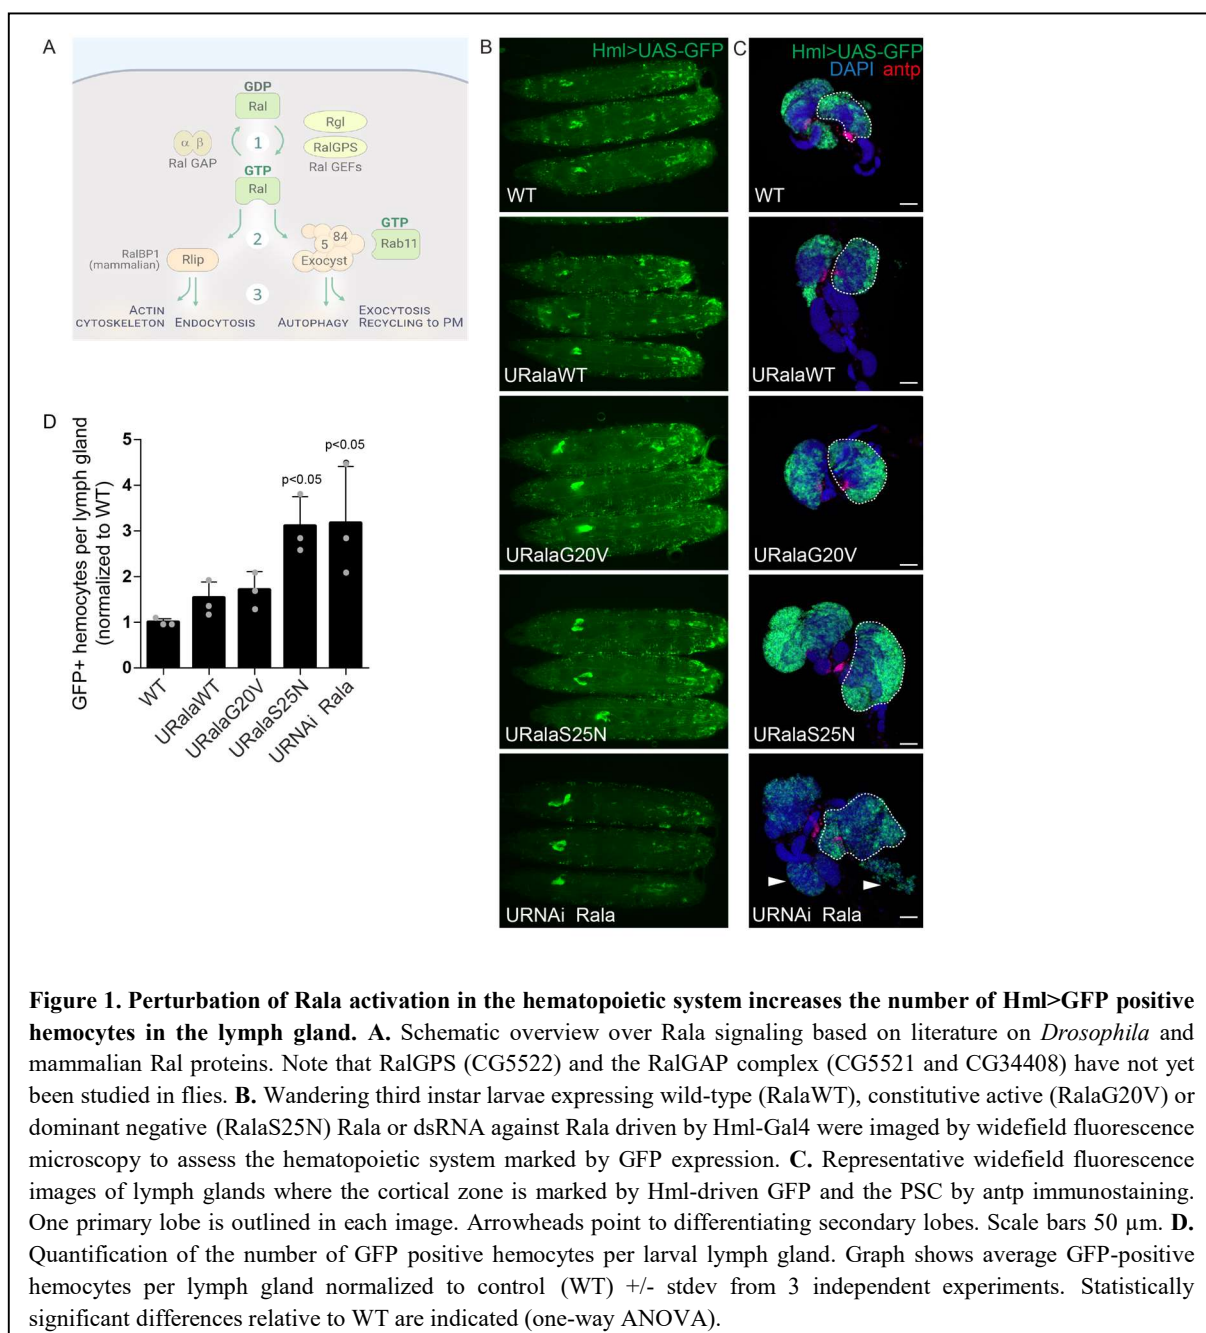

## 163 ***Ras and Rala act independently on hemocytes***

164 Since active Ras has previously been shown to strongly induce proliferation of circulating  
165 hemocytes in *Drosophila* (Asha et al., 2003; Zettervall et al., 2004) and Rala is activated  
166 downstream of active Ras in mammals, we investigated the effect of Ras and Rala on  
167 circulating hemocytes in 3<sup>rd</sup> instar larvae. In line with previous reports (Asha et al., 2003),  
168 expression of active RasV12 in the larval hematopoietic system with the *hml*<sup>Δ</sup>-Gal4 driver  
169 increased hemocyte numbers by 50-100 fold (Fig. 2A, C) and induced differentiation of  
170 lamellocytes, observed as actin-rich large cells (Fig. S4A). As Ras transmits signals through  
171 multiple effector pathways (Cox & Der, 2010), we expressed effector loop mutations of Ras  
172 in an attempt to define the Ras effector(s) involved. These effector loop mutations, namely,  
173 S35, G37, and C40, have been shown in mammalian cells to maintain interaction with only  
174 one of the three main Ras effectors, that is, Raf, RalGDS or PI3K, respectively (Joneson,  
175 White, Wigler, & Bar-Sagi, 1996; White, Vale, Camonis, Schaefer, & Wigler, 1996) (Fig. 2B).  
176 When expressed in the larval hematopoietic system, RasV12\_S35 enhanced hemocyte  
177 numbers similar to RasV12 itself, whereas RasV12\_G37 and RasV12\_C40 were significantly  
178 less effective (Fig. 2A, C and S4A). These results were not merely related to differences in  
179 expression levels (Fig. S4B). This suggested that the RasV12-induced hemocyte proliferation  
180 primarily depends on Raf-MAPK signaling. Indeed, when MAPK was depleted in hemocytes  
181 expressing RasV12, hemocyte numbers returned to close to wild-type levels (Fig. 2D and  
182 S4C). However, when Rala was depleted in hemocytes expressing RasV12, hemocyte  
183 numbers surprisingly increased even further, compared to RasV12 alone (Fig. 2D and S4D).  
184 This suggests not only that Rala does not mediate Ras signals, but that it actually opposes Ras  
185 in this process. Moreover, depletion of MAPK in hemocytes expressing RasV12\_S35  
186 (activating the Raf-MEK-MAPK signaling axis) abolished the RasV12\_S35-induced  
187 hemocyte proliferation (Fig. S4C). Rala depletion in hemocytes expressing RasV12\_G37  
188 (supposedly activating RalGEF-Ral signaling) did not affect the number of hemocytes (Fig.  
189 S4E). In fact, depleting MAPK in these RasV12\_G37-expressing hemocytes strongly  
190 inhibited the increased hemocyte numbers (Fig. S4C). It thus appears that RasV12\_G37 allele  
191 in this experimental paradigm may not signal through Rala, but mainly through the MAPK  
192 pathway. In conclusion, it appears that the RasV12\_G37 effector loop mutant cannot be used  
193 to study Rala signaling in the hematopoietic system of flies.

194 To obtain further evidence that Rala regulates the number of circulating hemocytes, we  
195 depleted Rala using RNAi. This resulted in a 2.5-fold increase in hemocyte numbers by 3 out



196 of 4 RNAi lines tested (Fig. 2E). Taken together, these data indicate that RasV12-induced  
 197 hemocyte proliferation is mediated by MAPK, that Rala signaling occurs independently of  
 198 Ras, and that Rala opposes Ras-MAPK-dependent hemocyte proliferation.

199

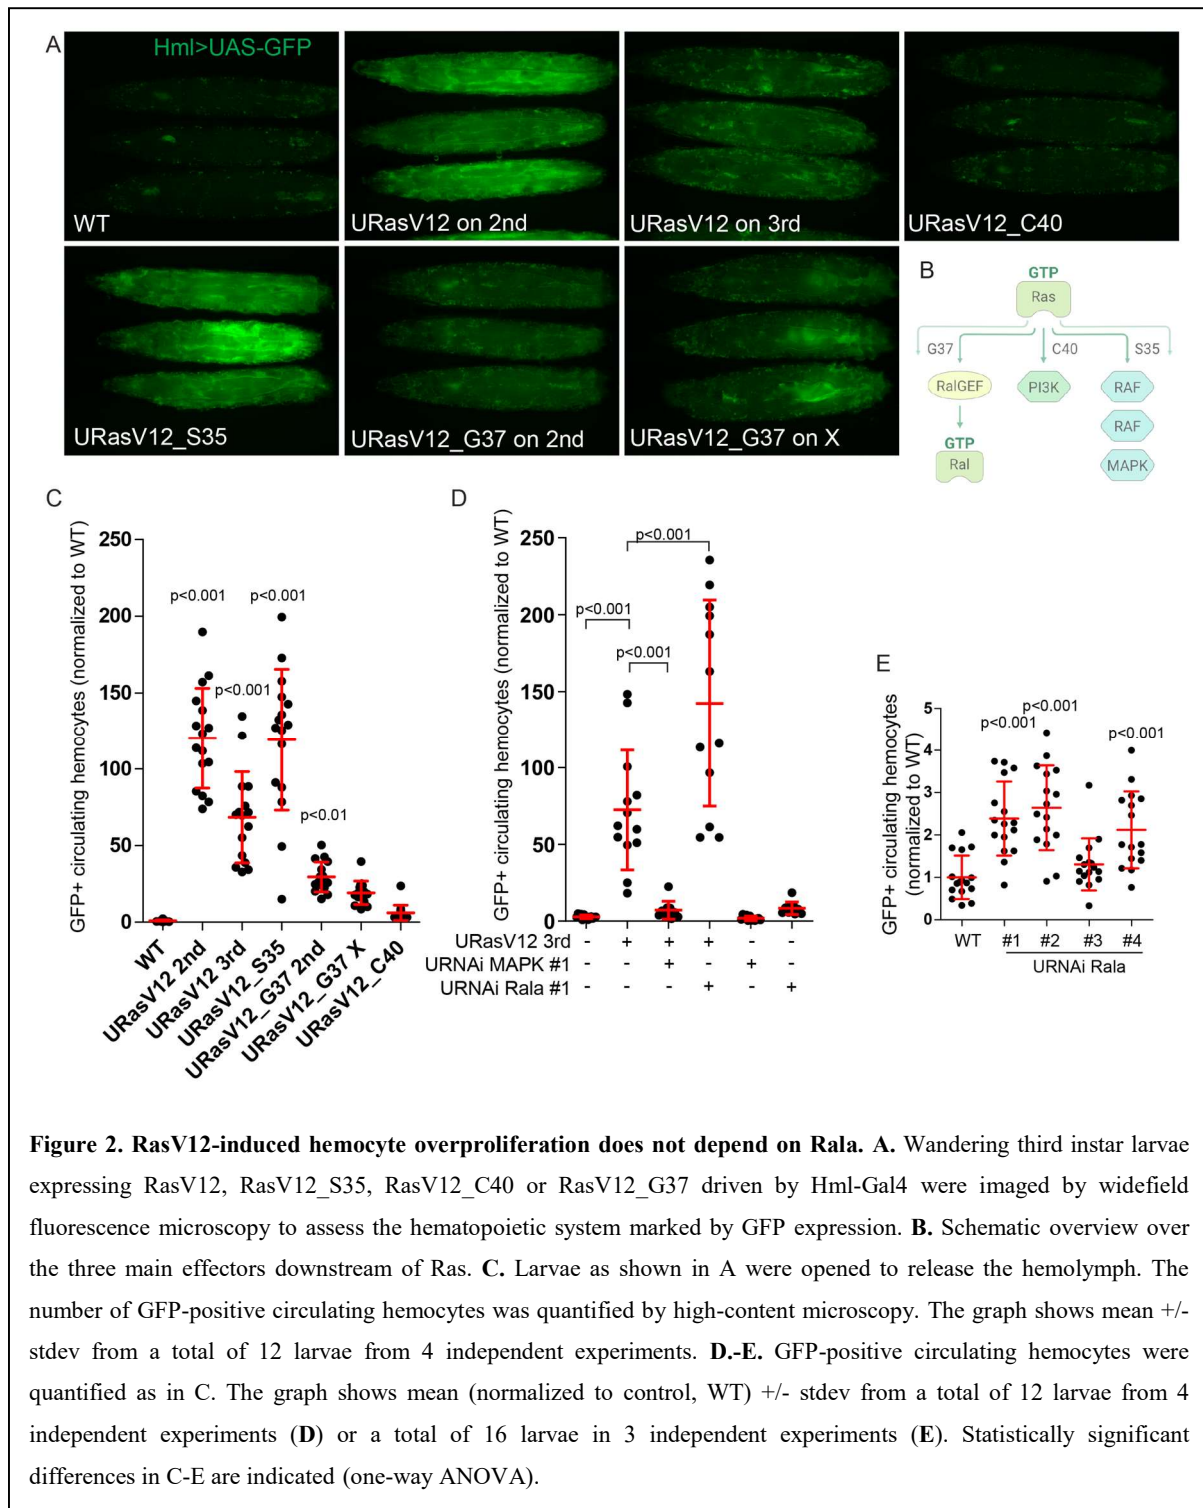

200 ***Rala is activated by the GEF RalGPS in hemocytes***

201 To gain a better understanding of signaling upstream of Rala in *Drosophila* hemocytes, we  
202 investigated the activation of Rala at the biochemical level. To this end, we used S2 cells as a  
203 cell culture model of hemocytes of embryonic origin (Cherbas et al., 2011). To detect GTP-  
204 bound active Rala, we used recombinant GST-tagged Ral-binding domains (RBDs) of either  
205 the human or the *Drosophila* versions of the Ral effectors Rlip/RalBP1 and Sec5 (Fig. S5A).  
206 Each GST-RBD protein strongly interacted with 3xFlag-tagged constitutively active GTP-  
207 locked RalaG20V expressed in S2 cells, and also interacted with 3xFlag-RalaWT, albeit to a  
208 much weaker degree (Fig. S5B). Expression of WT or constitutively active Rala did not affect  
209 PI3K-Akt or Raf-MAPK signaling as no significant changes in phosphorylation of Akt or  
210 MAPK were detected (Fig. S5B).

211 The *D. melanogaster* genome encodes two RalGEFs: Rgl and CG5522 (homologous to  
212 mammalian RalGPS and thus referred to as RalGPS hereafter). It also encodes one  $\alpha$ -  
213 (CG5521) and one  $\beta$ -subunit (CG34408) of the RalGAP heterodimer. To assess the impact of  
214 these proteins on Rala activation, we first demonstrated that GST-Rlip-RBD could indeed pull  
215 down endogenous GTP-loaded Rala (Fig. 3A, lanes 3-5) and confirmed that dsRNAs  
216 targeting the *Drosophila* *RalGEF* and *RalGAP* transcripts reduced their respective expression  
217 levels as measured by qPCR (Fig. S5C). Markedly, depletion of RalGPS strongly decreased  
218 the levels of active Rala (Fig. 3A, lanes 6-7), whereas Rgl depletion had no effect (Fig. 3A,  
219 lanes 8-10). Conversely, depletion of the RalGAP  $\alpha$ - or  $\beta$ -subunit strongly increased active  
220 Rala levels (Fig. 3A, lanes 11-13).

221 We next evaluated the impact of co-depleting RalGAP $\alpha$  along with the distinct RalGEFs.  
222 Recently, TD-60 (also known as RCC1) was described as a novel GEF for mammalian Ral  
223 (Papini et al., 2015). We tested whether the *Drosophila* homolog CG9135 (referred to as TD-  
224 60 hereafter) was required for Rala activity. We knocked down TD-60 either alone or in  
225 combination with of RalGAP $\alpha$ , but found that only depletion of RalGPS resulted in  
226 abrogation of Rala activity (Fig. 3B and Fig. S5D). We conclude that RalGPS is the GEF that  
227 activates Rala in S2 cells at steady state and that Rala activity is tightly controlled by the  
228 RalGAP heterodimer.

229 Since we observed no evidence of Rala mediating the hemocyte overproliferation observed  
230 upon RasV12 expression (Fig. 2 and S4), we next asked whether we could biochemically  
231 detect Rala activation downstream of active Ras in S2 cells. To this end, we used three

232 different strategies: 1) stimulation of *Drosophila* EGFR (DER)-expressing S2 cells with  
 233 supernatant from cells producing the EGFR ligand Spitz (Fig. S6A), 2) induction by heat-  
 234 shock of a constitutively active Sevenless receptor (Sev<sup>S11</sup>) (Basler, Christen, & Hafen, 1991;  
 235 Therrien, Wong, & Rubin, 1998) (Fig. S6B) and 3) stimulation of S2 cells with human  
 236 recombinant insulin over a time-course of 2.5 to 80 minutes (Fig. S6C). In each case,  
 237 activation of Ras-MAPK signaling was confirmed by phosphorylation of MAPK, whereas

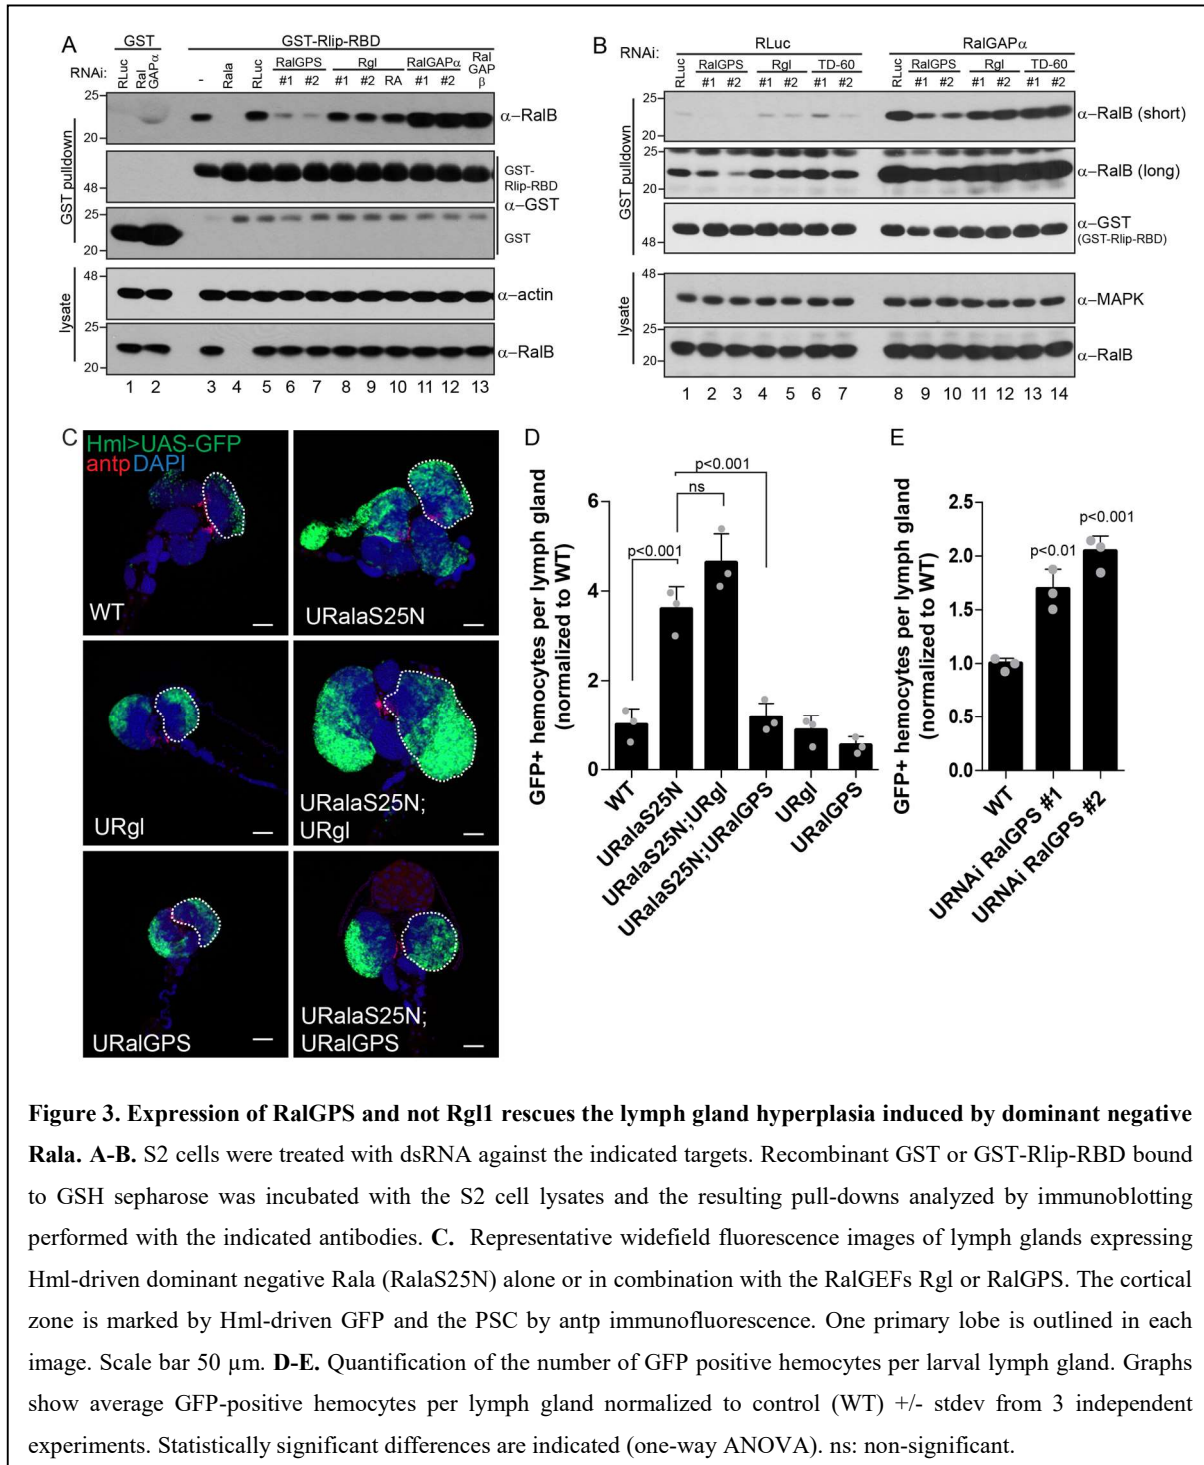

238 activation of Rala was assessed by GST-RBD pulldown as described above. In neither of  
239 these three experimental setups did we detect any activation of Rala in the time-frame tested.  
240 We conclude that *Drosophila* Rala is not activated downstream of active Ras upon any of  
241 these stimuli.

242 Since we found RalGPS and not Rgl to be the GEF for Rala in unstimulated S2 cells, we  
243 wondered which RalGEF was mediating activation of Rala in the lymph gland. We detected  
244 expression of both GEFs by transcriptome analysis of entire lymph glands, but RalGPS  
245 mRNA was about 4 times more abundant than Rgl mRNA (Table S1). Interestingly, in  
246 contrast to Rgl, we found that RalGPS overexpression completely suppressed the increased  
247 number of GFP-positive hemocytes caused by RalaS25N expression in the cortical zone (Fig.  
248 3C-D). Overexpression of either Rgl or RalGPS alone did not significantly affect the number  
249 of GFP-positive hemocytes per lymph gland (Fig. 3C-D). Conversely, reduction of RalGPS  
250 by RNAi phenocopied a loss of Rala activity and led to an increased number of GFP-positive  
251 hemocytes per lymph gland (Fig. 3E, S7A). We conclude that RalGPS is the GEF responsible  
252 for Rala activation in the lymph gland, similar to the situation in S2 cells.

253

#### 254 ***The exocyst complex and Rab11 act downstream of Rala in hemocytes***

255 To further dissect the Rala signaling axis active in the lymph gland, we separately depleted by  
256 RNAi the three main effectors of Rala, namely, Sec5 and Exo84 of the exocyst complex and  
257 Rlip/RalBP1. Depletion of Sec5 or Exo84 led to an increase in GFP-positive hemocyte  
258 numbers similar to Rala depletion, whereas depletion of Rlip had no effect (Fig. 4A-B and  
259 S7B and C). Since exocyst components can exist in different sub-complexes and have  
260 functions independent of the full exocyst complex (Wu & Guo, 2015), we individually  
261 depleted most of the 8 exocyst subunits and found that depletion of either Sec6, Sec8 or Sec15  
262 led to enlarged cortical zones, similar to the depletion of Exo84 or Sec5 (Fig. S7D). It thus  
263 appears that the exocyst complex, and not Rlip/RalBP1, functions downstream of Rala for  
264 lymph gland homeostasis.

265 The exocyst complex is involved in various membrane trafficking events such as exocytosis,  
266 endosome / membrane receptor recycling and autophagy (Wu & Guo, 2015). To pinpoint  
267 which of these functions might be involved in lymph gland homeostasis, we depleted either  
268 the small GTPase Rab11 (a central player in vesicular endocytosis and recycling, and a direct  
269 interaction partner of the exocyst complex) or several components of the autophagy  
270 machinery. Depletion of Rab11 led to an increase in the number of GFP-positive hemocytes  
271 per lymph gland, whereas depletion of various autophagy components had no effect (Fig. 4C-  
272 D and S8A-B). These findings suggest that membrane trafficking events linked to endocytosis  
273 and/or endosome recycling are important for lymph gland homeostasis.

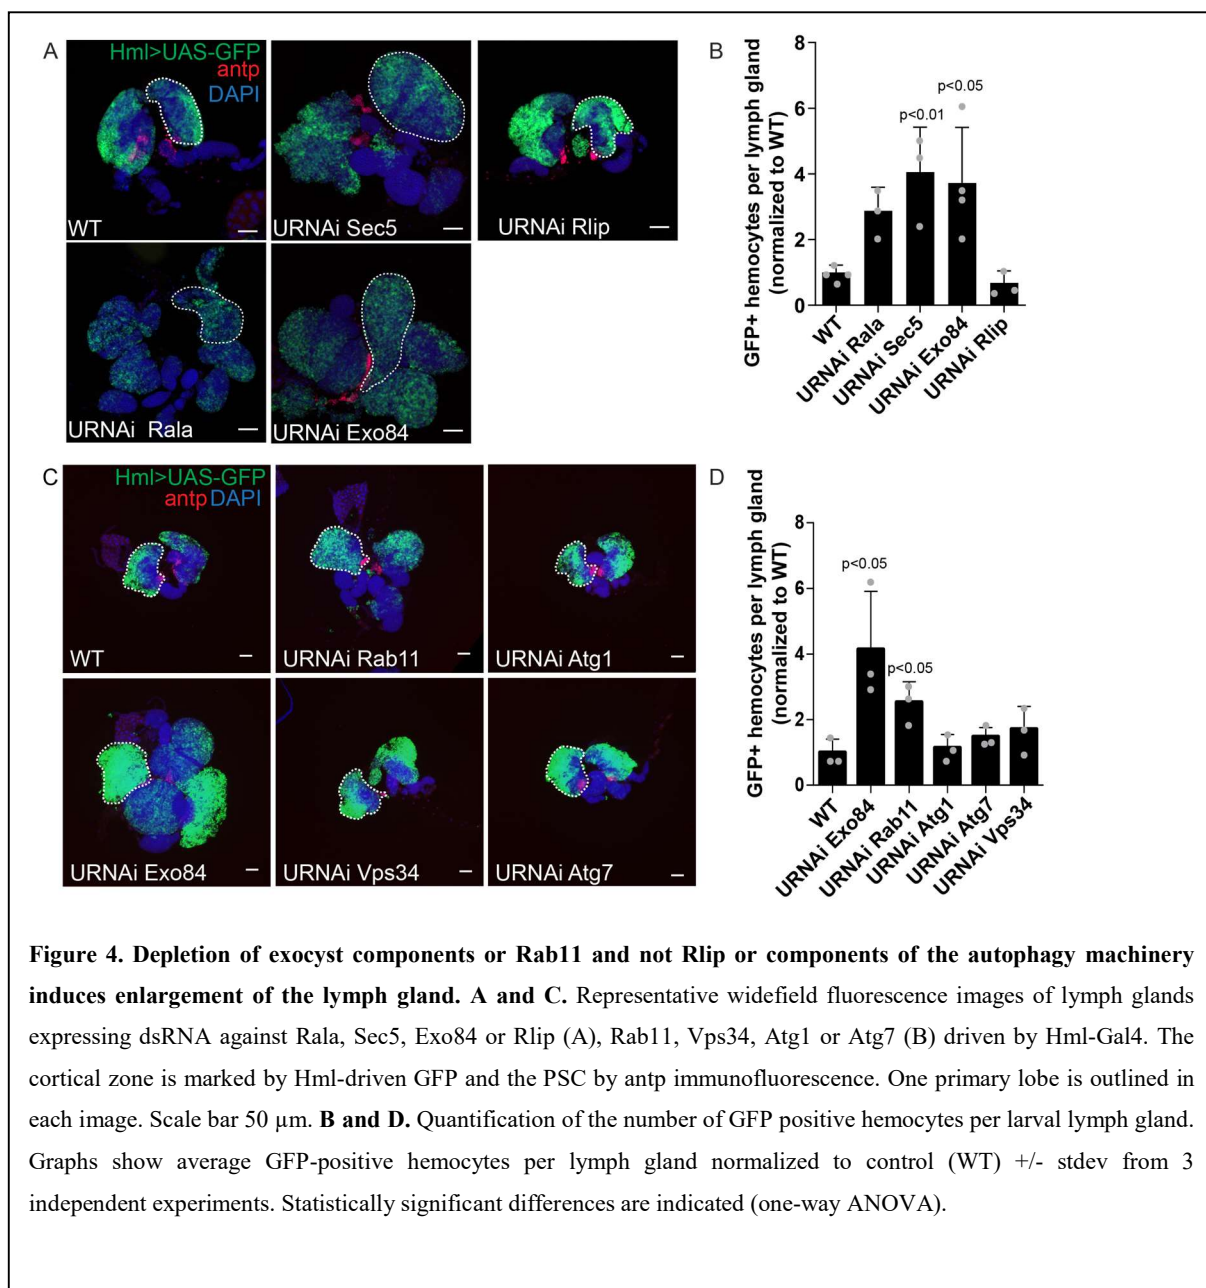

274 The RTK Pvr controls the differentiation of hemocytes from prohemocytes. Increased Pvr  
275 activity in the cortical zone hinders differentiation of prohemocytes from the medullary zone,  
276 resulting in small lymph glands. Conversely, Pvr depletion triggers hemocyte differentiation  
277 from the medullary zone leading to enlarged cortical zones (Fig. S9A-B) (Mondal et al., 2011).  
278 We stained for Pvr, expecting to find decreased levels in the cortical zone of Rala or exocyst  
279 depleted lymph glands. To our surprise, Pvr levels were increased upon depletion of Rala,  
280 Sec5, Exo84 or Rab11 (Fig. 5A). Imaging of a smaller area of the cortical zone showed that  
281 Pvr appears to accumulate close to the plasma membrane when Rala or Sec5 are depleted (Fig.  
282 5B).  
283 We currently do not know the mechanism affected by the loss of Rala / exocyst activity,  
284 which impinges on Pvr levels at the plasma membrane. Nevertheless, since the loss of Rala /

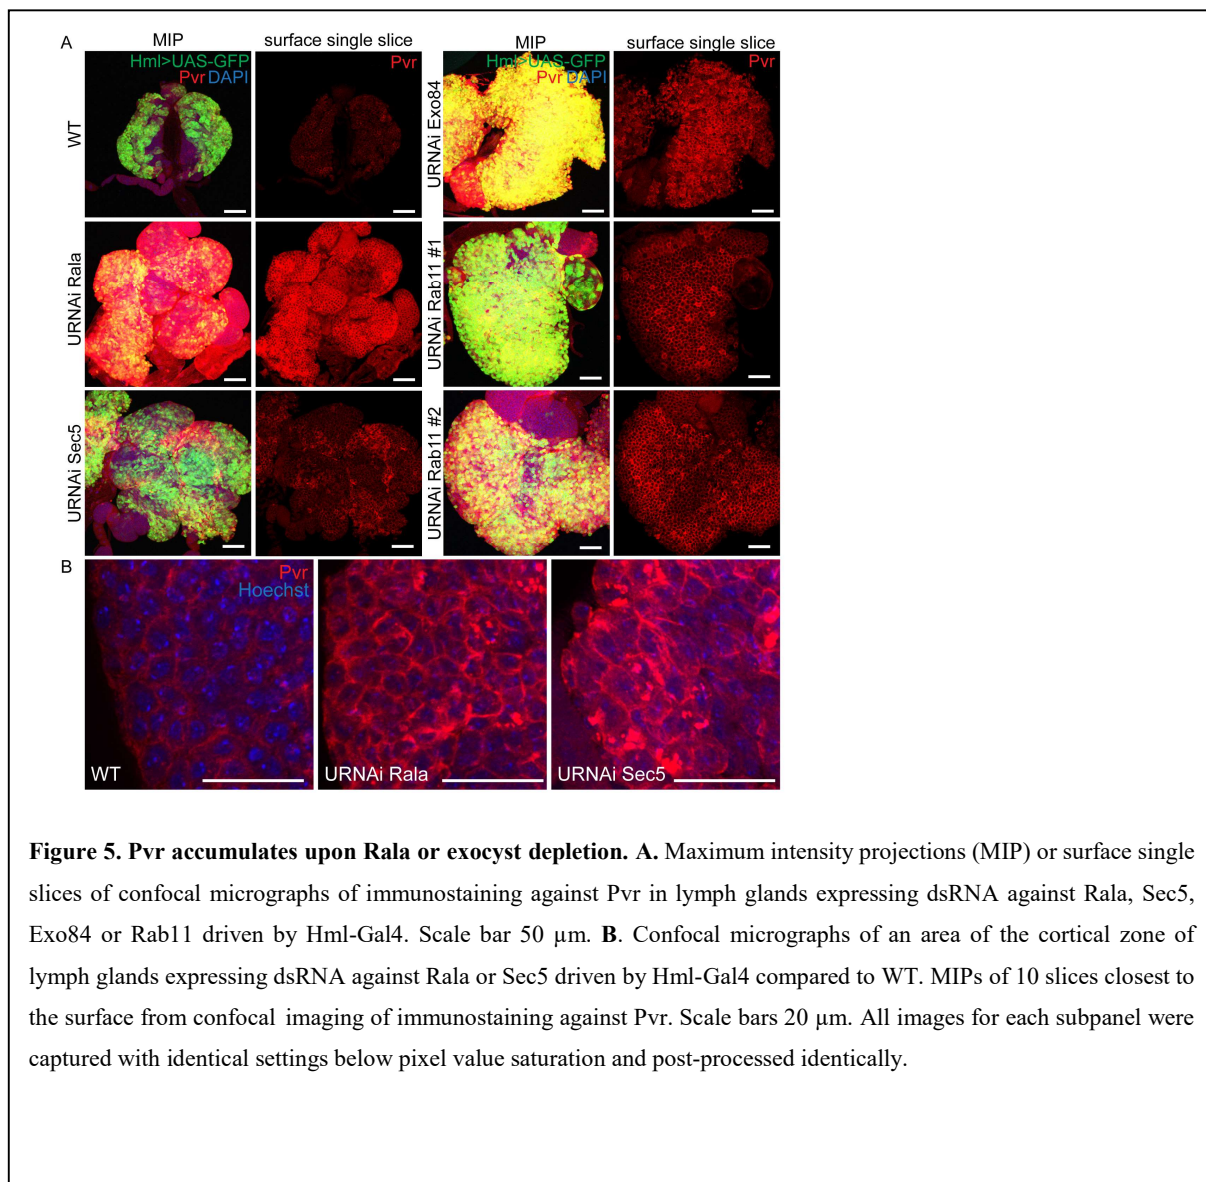

**Figure 5. Pvr accumulates upon Rala or exocyst depletion.** **A.** Maximum intensity projections (MIP) or surface single slices of confocal micrographs of immunostaining against Pvr in lymph glands expressing dsRNA against Rala, Sec5, Exo84 or Rab11 driven by Hml-Gal4. Scale bar 50  $\mu$ m. **B.** Confocal micrographs of an area of the cortical zone of lymph glands expressing dsRNA against Rala or Sec5 driven by Hml-Gal4 compared to WT. MIPs of 10 slices closest to the surface from confocal imaging of immunostaining against Pvr. Scale bars 20  $\mu$ m. All images for each subpanel were captured with identical settings below pixel value saturation and post-processed identically.

285 exocyst activity in the cortical zone phenocopied Pvr impairment, we conclude that the  
 286 elevated levels of Pvr proteins observed upon Rala / exocyst depletion have also reduced  
 287 activity. To verify this possibility, we ectopically expressed Pvr in Rala or exocyst depleted  
 288 cortical zones. As shown in Fig. 6A-B, Pvr overexpression in the cortical zone in combination  
 289 with depletion of either Rala, Sec5, Exo84 or Rab11 rescued the enlarged lymph gland size  
 290 (Fig. 6A-B). Pvr expression could also rescue the enlarged cortical zone induced by dominant  
 291 negative RalaS25N (Fig. S9C-D). We assume that upon overexpression of Pvr, enough  
 292 productive signaling occurs and thereby restore lymph gland homeostasis. It is known that Pvr  
 293 equilibrium signaling is mediated mainly through Stat92E (Mondal et al., 2011). Consistently,

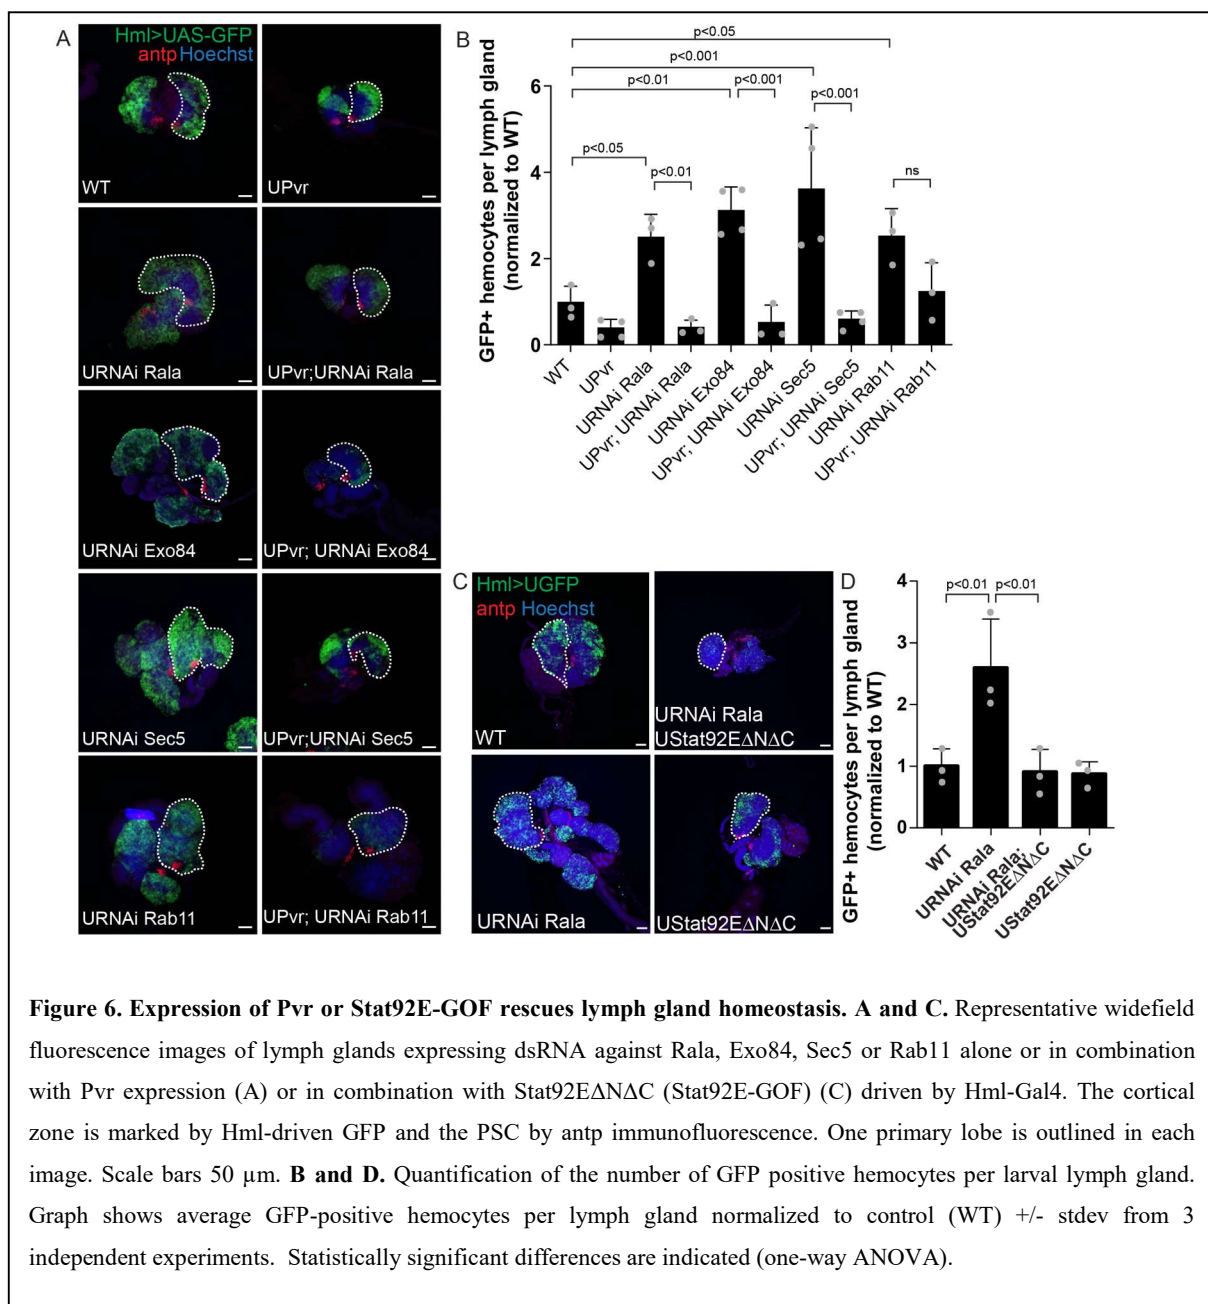

294 expression of a dominant active Stat92E, Stat92E $\Delta$ N $\Delta$ C (Ekas et al., 2010), rescued the  
 295 enlargement of the cortical zone induced by Rala depletion (Fig. 6C-D).

296 In summary, we propose a model where a RalGPS-Rala-exocyst-Rab11 axis is required for  
 297 lymph gland homeostasis (Fig. 7). In the absence of a functional Rala axis, there is a loss of  
 298 equilibrium signaling and a loss of feedback within the lymph gland, resulting in the  
 299 expansion of the cortical zone. We suggest that the loss of equilibrium signaling is due to the  
 300 RalGPS-Rala-exocyst-Rab11 axis normally regulating a step impinging on Pvr accumulation  
 301 at the plasma membrane and required for downstream signaling.

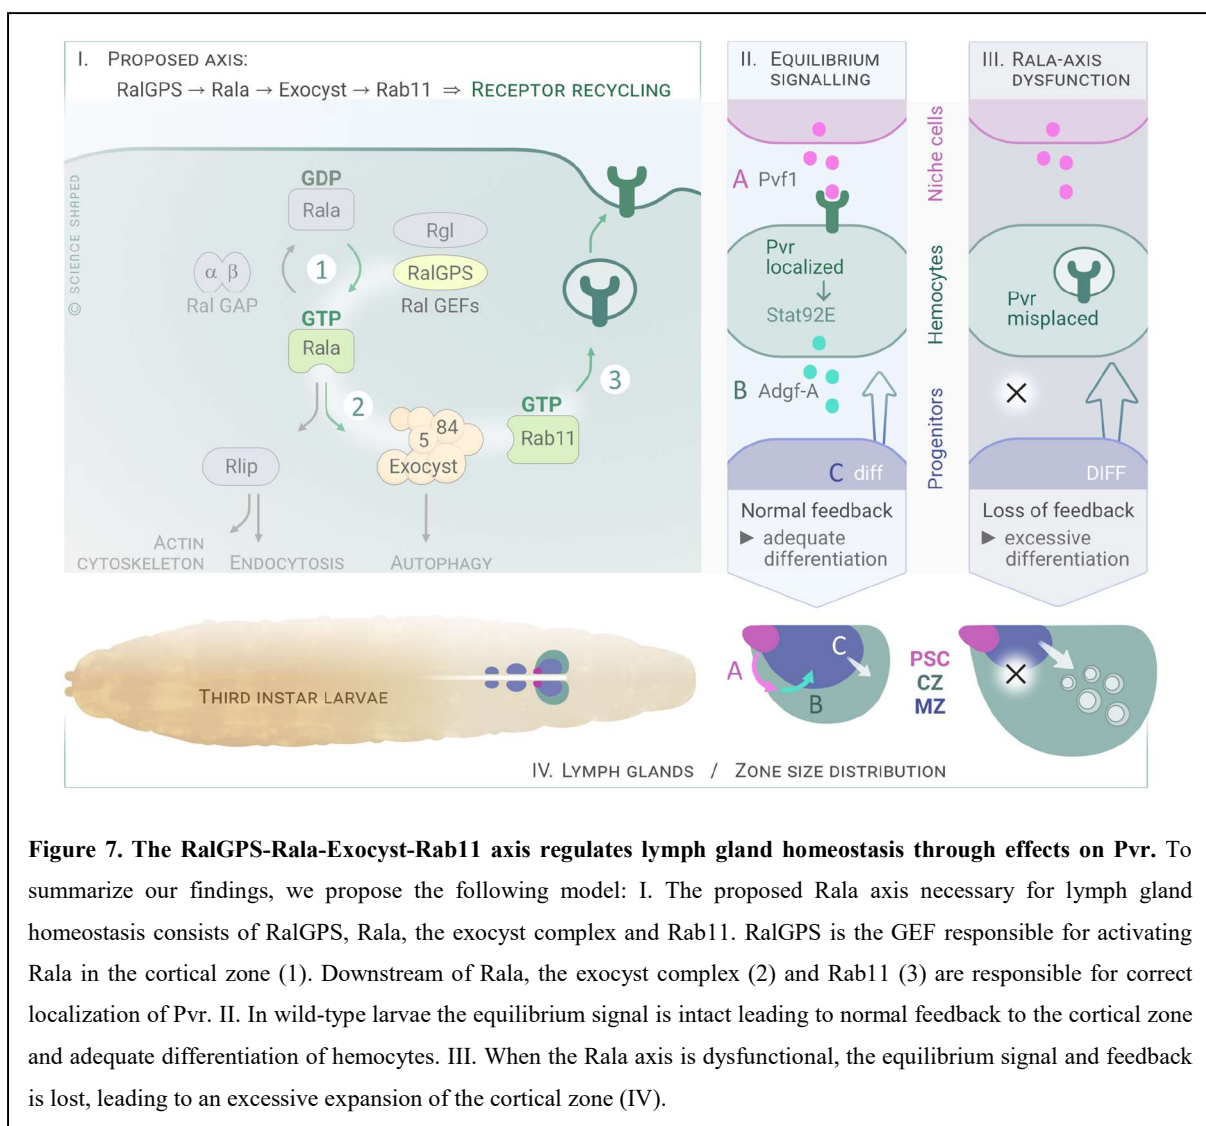

302



## 303 Discussion

304 In contrast to mammalian VEGF and PDGF receptors, which encompass multiple isoforms,  
305 *Drosophila* encodes a single PDGF/VEGF-like receptor, known as Pvr. In the developing  
306 lymph gland, Pvf-induced Pvr signaling occurs in differentiating hemocytes of the cortical  
307 zone. This event regulates progenitor maintenance in the adjacent medullary zone through a  
308 process called “equilibrium signaling”, which involves STAT92E activity as well as ADGF-A  
309 expression downstream of Pvr (Mondal et al., 2011). ADGF-A is a secreted enzyme that  
310 keeps in check the levels of extracellular adenosine (Zurovec, Dolezal, Gazi, Pavlova, &  
311 Bryant, 2002), an inducer of progenitor differentiation (Mondal et al., 2011). A number of  
312 factors such as Bip1, Nup98, RpS8, and Sd have been shown to impinge on Pvr expression  
313 and thereby modulate equilibrium signaling (Ferguson & Martinez-Agosto, 2017; Mondal,  
314 Shim, Evans, & Banerjee, 2014). Although their respective mechanisms have yet to be  
315 determined, none appeared to affect Pvr trafficking. In the present work, we described a novel  
316 Rala-exocyst-Rab11 signaling axis as an additional level of regulation of Pvr signaling  
317 through receptor trafficking that accordingly impinges on equilibrium signaling.

318 We found that depletion of Rala, exocyst or Rab11 in the cortical zone of the lymph gland  
319 leads to hyperplasia of this tissue. Presumably, this is because Pvr is incorrectly trafficked,  
320 which impedes its normal signaling, disrupts the equilibrium signal and results in excessive  
321 progenitor differentiation. Endocytosis and recycling strongly affect signaling from receptors  
322 of the mammalian PDGFR and VEGFR families (Hellberg, Schmees, Karlsson, Ahgren, &  
323 Heldin, 2009; Horowitz & Seerapu, 2012; Kawada et al., 2009; Lennartsson, Wardega,  
324 Engström, Hellman, & Heldin, 2006; Nakayama et al., 2013). PDGF and VEGF receptor  
325 signaling is also regulated at internal compartments, such early endosomes (Ballmer-Hofer,  
326 Andersson, Ratcliffe, & Berger, 2011; Lanahan et al., 2010; Muratoglu, Mikhailenko, Newton,  
327 Migliorini, & Strickland, 2010; Wang, Pennock, Chen, Kazlauskas, & Wang, 2004).  
328 Furthermore, Pvr localization and trafficking is important for its signaling in physiological  
329 settings in *Drosophila*, such as in border cells, which also depends on Rab11 (Janssens, Sung,  
330 & Rorth, 2010; Jekely, Sung, Luque, & Rorth, 2005). We found that loss of the Rala signaling  
331 axis leads to Pvr accumulation close to the plasma membrane. The exact localization and  
332 nature of compartment is yet to be determined, but genetic experiments point to a defect in  
333 receptor recycling. The observed increase in Pvr levels might reflect a reduction in receptor  
334 downregulation due to trafficking defects, or an upregulation of Pvr expression as a  
335 compensatory mechanism to cope with the perturbed trafficking and impeded signaling, or a

336 combination of both. Still, exogenous expression of Pvr can rescue loss of Rala function. We  
337 attribute this to correct localization for signaling of newly synthesized receptors, following a  
338 different trafficking path than existing receptors destined for recycling or downregulation,  
339 possibly also in combination with exogenous expression simply allowing enough receptor  
340 molecules to signal correctly. Rala and the exocyst-Rab11 signaling axis therefore represent  
341 another level to allow regulation of Pvr signaling through membrane trafficking.

342 Previous studies have linked perturbations of endocytic trafficking to changes in levels of  
343 differentiated hemocytes (Rohan J. Khadilkar et al., 2017; R. J. Khadilkar et al., 2014; Kim et  
344 al., 2017; Korolchuk et al., 2007; Kulkarni, Khadilkar, Magadi, & Inamdar, 2011).  
345 Interestingly, loss of the endocytic protein Asrij or the small GTPase Arf79f, which has an  
346 essential function in vesicular trafficking, results in loss of prohemocyte maintenance and  
347 premature differentiation (R. J. Khadilkar et al., 2014; Kulkarni et al., 2011). However, in this  
348 case, Asrij and Arf79f were found to function downstream of Pvr (R. J. Khadilkar et al., 2014),  
349 indicating that membrane trafficking is important at multiple levels of signaling for progenitor  
350 maintenance. Future studies should address the connection between the ARF1-Asrij and the  
351 Rala-exocyst axis in maintenance of blood cell progenitors.

352 In mammalian cells, RalA/B are effectors downstream of Ras. As in previous tissues studied  
353 in *Drosophila* (Mirey et al., 2003), we did not find Rala to act downstream of Ras in the larval  
354 hematopoietic system or in S2 cells. Instead, we found that Rala is regulated by its GEF  
355 RalGPS in S2 cells at steady-state and in the lymph gland. In contrast to Rgl, RalGPS does  
356 not contain a RAS exchanger motif (REM) or RAS association (RA) domain, which would  
357 allow direct regulation by small GTPases like Rap1 and Ras. Instead, RalGPS contains a C-  
358 terminal PH domain that is sufficient for membrane targeting and necessary for Ral activation  
359 in mammalian cells (de Bruyn et al., 2000; Rebhun, Chen, & Quilliam, 2000). Mammalian  
360 RalGPS1/2 also contain a proline-rich sequence with PxxP motifs recognized by SH3  
361 domain-containing proteins. Little is known about the function and regulation of RalGPS  
362 proteins. Mechanistically, human RalGPS1 and RalGPS2 localize differently and affect  
363 cytokinesis at different stages (Cascone et al., 2008). Murine RalGPS2 is involved in  
364 formation of tunneling nanotubes (D'Aloia et al., 2018) and its PH-PxxP domain promotes  
365 neurite outgrowth in cell culture by acting as a dominant negative for RalA (Ceriani, Amigoni,  
366 Scanduzzi, Berruti, & Martegani, 2010). Regarding regulation, murine RalGPS2 appears to  
367 bind PI(4,5)P2, PI(3,4)P2, PI(3,5)P2 and PI(3,4,5)P3 (Ceriani et al., 2007). Furthermore,  
368 RalGPS2 localization was partly modified and its activation of RalA diminished by the PI3K

369 inhibitor wortmannin (Ceriani et al., 2007). Regulation of RalGPS by PtdIns kinases and  
370 phosphatases or by SH3-domain containing proteins in the lymph gland or other fly tissues is  
371 yet to be addressed.

372 Depletion of either the regulatory or the catalytic subunit of the RalGAP complex strongly  
373 increased Rala activation in S2 cells (Fig. 3). However, activating Rala in the lymph gland by  
374 overexpression of RalGPS did not affect lymph gland morphology (Fig. 3C-D), although  
375 expression of constitutively active Rala slightly increased the number of Hml-GFP positive  
376 cells (Fig 1B-D). In mammalian cells, the RalGAP complex is directly regulated by the  
377 serine/threonine kinase AKT, which phosphorylates the catalytic subunit RalGAP $\alpha$  and  
378 inhibits its interaction with RalA (Q. Chen et al., 2014; X. W. Chen et al., 2011). Insulin  
379 stimulates this phosphorylation, to increase RalA activity and promote exocytosis of GLUT4-  
380 containing vesicles resulting in increased glucose uptake (X. W. Chen, Leto, Chiang, Wang,  
381 & Saltiel, 2007; X. W. Chen et al., 2011). We have not directly addressed the regulation of the  
382 RalGAP complex in flies, but stimulation of S2 cells with human insulin did not appear to  
383 activate Rala under the conditions tested (Fig. S3).

384 Although it was previously reported that *Atg6* mutant flies have enlarged lymph glands  
385 (Shravage, Hill, Powers, Wu, & Baehrecke, 2013), we did not find any effect on lymph gland  
386 size of depleting autophagy components specifically in the cortical zone of the lymph gland.  
387 Nutritional signals are well established as regulating the hematopoietic system as a systemic  
388 signal, entailing cues from the brain and the fat body to hemocytes (Dragojlovic-Munther &  
389 Martinez-Agosto, 2012; Shim, Mukherjee, & Banerjee, 2012). Starved larvae show premature  
390 and excessive differentiation of hemocytes (Benmimoun, Polesello, Waltzer, & Haenlin, 2012;  
391 Shim et al., 2012) and the enlarged lymph glands in autophagy-deficient animals might be  
392 related to changes in metabolic signaling.

393 RalA/B is involved in several human cancer types, either dependent or independent of Ras  
394 mutations (Gentry et al., 2014). Overexpression of Ral proteins or RalGEFs or increased Ral  
395 activation has been observed in cancer cell lines and patient samples (Gentry et al., 2014).  
396 Depletion or deletion of RalA/B in cell lines and in mice reduced cancer-relevant processes,  
397 such as anchorage-independent growth, metastasis and invasion of several cancer types. These  
398 cancer-promoting effects of RalA/B have been linked to both Rlip/RalBP1 and the exocyst in  
399 a manner that depends on the Ral isoform and the cancer type (Yan & Theodorescu, 2018).  
400 Components of the exocyst have been found to be upregulated in certain cancer types and to

401 affect cancer-relevant cell biology dependent or independent of Ral proteins (Tanaka, Goto, &  
402 Iino, 2017). The mammalian PDGFR and VEGFR families are involved in normal  
403 hematopoiesis and various blood dysplasias (Demoulin & Montano-Almendras, 2012; Gerber  
404 & Ferrara, 2003). Activating mutations in the PDGFR family member Flt3 is observed in  
405 approximately 30% of acute myeloid leukemia cases (Cancer Genome Atlas Research et al.,  
406 2013). Interestingly, this mutated receptor is partly retained in the endoplasmic reticulum,  
407 from where it drives oncogenic signaling (Choudhary et al., 2009). Future studies should  
408 address the role of RalA/B and the exocyst in normal and oncogenic signaling from RTKs in  
409 the PDGFR and VEGFR families.

## 410 **Materials and methods**

### 411 *Fly stocks*

412 *hml<sup>Δ</sup>-Gal4*, *UAS-2XeGFP* BL30142 and BL30140, P{w[+mC]=Cg-GAL4.A BL7011, TRiP  
413 lines UAS-RNAi Rala BL29580 and BL34375, UAS-RNAi Sec5 BL27526, UAS-RNAi  
414 Exo84 BL28712, UAS-RNAi MAPK BL36058 and BL34855, UAS-RNAi Rab11 BL27730,  
415 UAS-RNAi Atg1 BL26731, UAS RNAi Atg4 BL35740, UAS RNAi Atg5 BL27551, UAS-  
416 RNAi Atg6 BL35741, UAS-RNAi Atg7 BL27707, UAS-RNAi Atg12 BL27552, UAS-RNAi  
417 Atg16 BL28060, UAS RNAi Atg18 BL34714 were obtained from the Bloomington Stock  
418 Center. RNAi lines UAS-RNAi Rala 105296 and 43622, UAS-RNAi Sec5 28873 and 28874,  
419 UAS-RNAi RalGPS/CG5522 40595 and 40596, UAS-RNAi Exo84 108650 and 30112, UAS-  
420 RNAi Rlip 16244 and 101635, UAS-RNAi MAPK 43123, UAS-RNAi Sec6 105836 and  
421 22079, UAS-RNAi Sec8 45032 and 105653, UAS-RNAi Sec15 35162 and 35161, UAS-  
422 RNAi Vps34 107602, UAS-RNAi Atg8a 43096, UAS-RNAi Atg8b 17079, UAS-RNAi  
423 Rab11 108297, UAS-RNAi PVR 105353 were from VDRC (Dietzl et al., 2007). R3-*hmlΔ-*  
424 *Gal4*, *UAS-2xeGFP* (Honti et al., 2013), UAS-RasV12, UAS-RasV12\_S35, UAS-  
425 RasV12\_G37, UAS-RasV12\_C40 (Karim & Rubin, 1998), UAS-RalaWT, UAS-RalaG20V,  
426 UAS-RalaS25N (Sawamoto et al., 1999) and UAS-Rgl (Mirey et al., 2003), UAS-RNAi  
427 Vps15 (Abe et al., 2009), UAS-PVR (Duchek, Somogyi, Jékely, Beccari, & Rørth, 2001),  
428 UAS-Stat92EΔNΔC (Ekas et al., 2010) have been reported elsewhere. See a full list of stocks  
429 used in Table S2. The crosses were performed on German fly food (recipe available at  
430 [http://flystocks.bio.indiana.edu/Fly\\_Work/media-recipes/germanfood.htm](http://flystocks.bio.indiana.edu/Fly_Work/media-recipes/germanfood.htm)) supplemented with  
431 food coloring agent to allow visualization of the gut contents. The emptying of the gut marks  
432 the transition from wandering to resting third instar larvae, and only wandering third instar  
433 larvae were analyzed. Crosses were set up at 25 °C and shifted to 29 °C 66 h later to  
434 maximize Gal4 activity. Larvae were dissected under a UV lamp (Nightsea, GFP filter) for  
435 easy identification of GFP-positive lymph glands.

436

### 437 *Cloning and transgenics*

438 pGEX-Sec5-RBD and pGEX-RalBP1-RBD encoding GST-tagged Ral-binding domains  
439 (RBDs) of human Sec5 and RalBP1 were a kind gift from A. Saltiel, University of Michigan.  
440 The sequences corresponding to the RBDs of *D. melanogaster* Sec5 and Rlip/RalBP1 were  
441 amplified from the plasmids SD03467 and GH01995 (DGRC), respectively, with primers 5'-  
442 ATAGAATTTCGCGCCGCAGCCAGTGGTTAC-3' and 5'-

443 ATAGCGGCCGCCCCGACCCAGGCAAATTCTG-3' (Sec5) and 5'-  
444 ATAGAATTCGACATCCAGACGGAGTTGCG-3' and 5'-  
445 ATAGCGGCCGCCTTGAGCCTATAGACTTCGTTG-3' (Rlip/RalBP1) and inserted into  
446 EcoRI and NotI sites of pGEX-4T-1.

447 To generate pMet-3xFlag-Rala<sup>WT</sup> and -G20V plasmids, the Rala sequence was amplified  
448 from the plasmid LD21679 (DGRC) with primers 5'-  
449 ATAGGTACCatgGACTACAAAGACCATGACGGTGATTATAAAGATCATGACATCGA  
450 TTACAAGGATGACGATGACAAGGaaAGCAAGAAGCCGACAGC-3' (to add N-terminal  
451 3xFlag) or 5'-  
452 ATAggtaccATGAGCAAGAAGCCGACAGCCGGACCGGCGCTCCACAAGGTCATAAT  
453 GGTGGGCAGTGTGCGCGTGGGAAAGTCC-3' (to make the G20V mutation)

454 and 5'-ATAGCGGCCGCATGAGCAAGAAGCCGACAGC-3' and inserted into pMet using  
455 KpnI and NotI sites. All constructs were verified by sequencing.

456 The RalGPS (CG5522) coding sequence was amplified from the plasmid LD24677 (DGRC)  
457 with primers 5'-ATAGCGGCCGCATGATGCGATACTCGGAAATCTC-3' and 5'-  
458 ATAGGTACCGCCCGGCTTATTCAAAGGACATTAGG-3' and inserted into pUASTattB  
459 using NotI and KpnI sites. Transgenics were generated by  $\phi$ C31-mediated site-specific  
460 integration (Bischof, Maeda, Hediger, Karch, & Basler, 2007) into attP154.

461  
462 *Cell culture, lysates, Ral-GTP pulldown and western blotting*

463 *Drosophila* S2 cells were cultured at 27 °C in Schneider medium (Invitrogen) supplemented  
464 with 10% fetal bovine serum. S2 cells stably transfected with the following constructs have  
465 been described elsewhere: *pHS-SevS11* (Therrien et al., 1998), *pMet-EGFR* (a gift from N.  
466 Perrimon). pMet driven expression of EGFR was induced by adding 0.7 mM CuSO<sub>4</sub> 24 h  
467 prior to lysis and the cells were stimulated with the supernatant from Spitz secreting cells  
468 (Schweitzer, Shaharabany, Seger, & Shilo, 1995). *pHS-SevS11* cells were induced for 30 min  
469 at 37 °C and incubated for the indicated time at 27 °C before lysis. For insulin stimulation, S2  
470 cells were treated with 20 µg/mL human recombinant insulin (Life Technologies #12585-014)  
471 for 0 to 80 min. For western blot analysis of S2 cell lysates, cells were lysed in ice-cold lysis  
472 buffer (20 mM Tris, pH 8.0, 137 mM NaCl, 10% glycerol, 1% NP-40, 1 mM EDTA)  
473 supplemented with 1X phosphatase inhibitor cocktail (Sigma #P2850), 10 µg/mL each

474 aprotinin (Millipore Sigma #A6103) and leupeptin (Millipore Sigma #L2884), and 1 mM  
475 PMSF (Millipore Sigma #P7626). Lysates were then clarified by centrifugation at 10,000 x g.

476 Recombinant GST-tagged Ral-Binding Domains (RBDs) of human or *Drosophila* Sec5 or  
477 Rlip/RalBP1 were purified from bacteria by glutathione-Sepharose according to  
478 manufacturer's instructions. S2 cells were lysed in cold RBD buffer (100 mM Tris pH 7.5,  
479 150 mM NaCl, 10% glycerol, 5mM magnesium chloride, 1% NP-40, 1mM EDTA)  
480 supplemented with 1X phosphatase inhibitor cocktail (Sigma #P2850), 10 µg/mL each  
481 aprotinin and leupeptin, and 1 mM PMSF. 15 µg GST-fusion proteins immobilized on GSH-  
482 beads was added to lysates of equal protein concentration and incubated for 2 h at 4 °C. After  
483 3 washes in RBD buffer, the supernatant was completely removed, and bound proteins eluted  
484 by boiling in 2x Laemmli buffer.

485 For immunoblotting from fat body lysates, Rala transgenes or Rala RNAi was driven in the  
486 fat body by cg-Gal4. The fat bodies were dissected out and transferred to ice-cold lysis buffer  
487 (20 mM Tris, pH 8.0, 137 mM NaCl, 10% glycerol, 1% NP-40, 1 mM EDTA) supplemented  
488 with 1X phosphatase inhibitor cocktail (Sigma #P2850), 10 µg/mL each aprotinin (Millipore  
489 Sigma #A6103) and leupeptin (Millipore Sigma #L2884), and 1 mM PMSF (Millipore Sigma  
490 #P7626). Lysates were then clarified by centrifugation at 10,000 x g.

491 Protein samples were resolved by electrophoresis on 10-12% SDS-polyacrylamide gels and  
492 transferred to nitrocellulose membranes (Pall #66485). Specific proteins were detected using  
493 the following antibodies: anti-human RalB (1:1000; Proteintech 12340-1-AP), anti-GST  
494 (1:2000; Cell Signaling #2622), anti-MAPK (1:1000; Cell Signaling #4695); anti-AKT  
495 (1:2000; Cell Signaling #4691); anti-Actin (1:5000; Chemicon #MAB1501), anti-DER was  
496 kindly provided by G.M. Rubin, anti-pMAPK (1:1000; Cell Signaling #4370), anti-pAkt  
497 (1:1000; #4060), anti-sevenless was kindly provided by B.-Z. Shilo, anti-Flag (1:2000; Sigma  
498 F2555).

#### 499 *Production of dsRNA and RNAi experiments in S2 cells*

500 dsRNAs were generated as previously described (Clemens et al., 2000) with slight  
501 modifications. Sequences to target were selected from the DRSC database or designed when  
502 needed. DNA fragments (200-300 bp) containing coding sequences for the targeted proteins  
503 were amplified by PCR. Each PCR primer contained a 5'-T7 RNA polymerase binding site  
504 (GAATTAATACGACTCACTATAGGGAGA) followed by 21 nucleotides corresponding to

505 the targeted sequence (see Table S3). 1 µg PCR product was used per T7 in vitro transcription  
506 reaction and incubated for 16 h. dsRNAs were generated by heating RNA samples to 95 °C  
507 and annealed by slow cooling to room temperature, followed by 30 min DNase I treatment.  
508 dsRNAs were NaOAc/EtOH-extracted, ethanol-precipitated, and resuspended in RNase-free  
509 H<sub>2</sub>O. dsRNA quality was verified on 2 % agarose gels.

510 For RNAi experiments, 10 × 10<sup>6</sup> S2 cells were plated per 10 cm tissue culture dish (Nunc)  
511 with 10 µg/mL of the indicated dsRNAs and harvested 4 days later.

512

### 513 *Quantification of circulating hemocytes*

514 To count circulating hemocytes, single third instar wandering larvae were bled in ESF921  
515 (Expression systems) and transferred to individual wells of glass-bottom 384 well plates  
516 (Greiner µ-clear plate). The hemocytes were left to adhere for 1 h before fixation in 4% PFA,  
517 in PBS, followed by washes in PBS with 0.2% Triton X-100 (PBT 0.2%) and counterstaining  
518 of the nuclei with DAPI and the actin cytoskeleton with phalloidin-Alexa555 (Invitrogen).  
519 Mowiol was added to the wells before automated imaging with Operetta (PerkinElmer) or  
520 ScanR (Olympus) using a 20X objective. For each genotype, the number of GFP-positive  
521 hemocytes was quantified from at least 10 images from three individual larvae in four  
522 independent experiments using the Harmony (PerkinElmer) or ScanR analysis (Olympus)  
523 software. Identical analysis settings were applied for all samples within one experiment.

524

### 525 *Imaging of entire larvae*

526 To image entire larvae, wandering larvae of indicated genotypes were collected, washed in  
527 PBS with 1% Triton X-100 and put to sleep into a chamber saturated with ethyl ether for 25  
528 min. Anesthetized larvae were immobilized on a slide covered with double stick tape and  
529 immersed in glycerol before addition of a coverslip. Images were taken with an inverted  
530 microscope (Leica DM IRB) using a 2,5X objective. Alternatively, larvae were heat fixed. For  
531 this, larvae were washed as above, dried and put in a drop of glycerol on a microscope slide.  
532 The slide was placed on top of a heat block at 70 °C until the larvae stopped moving (this  
533 takes less than 10 s). A coverslip was added on top of the heat fixed larvae before imaging  
534 with a Leica MZFLIII stereomicroscope and LAS v4.9 Software.

535

### 536 *Immunofluorescence and microscopy*



537 For immunofluorescence microscopy of lymph glands, larvae were dissected in ESF921  
538 (Expression systems) supplemented with 1mM CaCl<sub>2</sub>, fixed for 15 min in 4%  
539 paraformaldehyde (PFA) in PBS on ice and washed three times in PBT 0.2%. The following  
540 conditions were used for each primary antibody: Hnt (1:10; DSHB 1G9, deposited by H.D.  
541 Lipshitz), Antp (1:100; DSHB 4C3, deposited by D. Brower), P1 (1:300; I. Ando (Kurucz,  
542 Markus, et al., 2007)), L1 (1:100; I Ando (Kurucz, Vaczi, et al., 2007)), Pvr (1:400; B. Shilo  
543 (Rosin, Schejter, Volk, & Shilo, 2004)), human RalB (1:100; Proteintech 12340-1-AP).  
544 Lymph glands were incubated overnight at 4 °C with primary antibodies, washed three times  
545 in PBT 0,2% and incubated at room temperature for 2 h with fluorophore-conjugated  
546 secondary antibodies (1:500) from Molecular Probes. Lymph glands were counterstained with  
547 100 ng/mL DAPI or Hoechst, washed twice in PBT 0,2% and mounted in Mowiol (Sigma).  
548 Confocal imaging was performed with three different confocal microscopes. First a LSM510  
549 (Carl Zeiss) confocal microscope, equipped with an Ar-laser multiline (458/488/514 nm), a  
550 laser diode 405–30 CW (405 nm), and two HeNe lasers (543 and 633 nm). The objective used  
551 with LSM510 was a Plan-Neofluar 40x/1.3 Oil DIC (Carl Zeiss). Alternatively, a Leica TCS  
552 SP8 confocal microscope equipped with a Plan-Apochromat 40x/1.3 Oil DIC objective, a UV  
553 (405nm) laser and a continuous wavelength (CW) white light laser set to 488 nm and 594 nm  
554 was used. Finally, a Zeiss LSM880 equipped with an Ar-laser multiline (458/488/514 nm), a  
555 DPSS-561 10 (561 nm), a laser diode 405–30 CW (405 nm), and an HeNe laser (633 nm).  
556 The objective used was a Plan-Apochromat 63x/1.4 Oil DIC III (Carl Zeiss).  
557 The overview images of entire lymph glands were acquired by a Zeiss Axio-imager using a  
558 10X objective.

559 For immunofluorescence imaging of circulating hemocytes, third instar wandering larvae  
560 were gently opened in PBS and the solution was transferred to individual wells of  
561 concanavalin A-coated 15 well microscope slides (MP Biomedicals) in triplicates. The  
562 hemocytes were left to adhere for 2 h before fixation in 4% PFA in PBS, followed by washes  
563 in PBT 0.2% and o.n. incubation with indicated antibodies. Hemocytes were then stained with  
564 secondary antibodies, counterstained with DAPI and imaged by confocal microscopy as  
565 described for lymph glands.

566

### 567 *Image processing and quantification*

568 For direct intensity comparisons, images were captured with identical settings below pixel  
569 value saturation and post-processed identically. Microscopy images were processed in ImageJ  
570 or Adobe Photoshop. Brightness and contrast were adjusted. Maximal intensity projections

571 were created in ImageJ or Zen 2012 software (Zeiss). Images were cropped to show an entire  
572 lymph gland or a region of interest.

573 Quantification of Hnt<sup>+</sup> compared to total DAPI<sup>+</sup> cells was performed with the Plot applet of  
574 Imaris software (Imaris 7.7.2, Bitplane AG, Zürich, Switzerland). Identical analysis settings  
575 were applied for all samples within one experiment.

576

#### 577 *Quantification of lymph gland size by flow cytometry analysis*

578 To quantify the lymph gland size, 15 glands were dissected and put immediately in 100 µl of  
579 1X trypsin-EDTA (No phenol red; Life technologies) diluted in PBS, incubated 15 min at  
580 25 °C and pipet up and down 40 times through a 200 µl siliconized tip. Trypsin was  
581 neutralized by adding 300 ul of 2% FBS in PBS and the cell suspension was filtered using a  
582 FACS tube with a cell-strainer cap (Falcon). The percentage of GFP<sup>+</sup> cells was determined by  
583 flow cytometry (BD FACSCanto II or LSRII). The total number of cells per sample was  
584 quantified by counting cells with a hemocytometer. The number of GFP<sup>+</sup> cells per lymph  
585 gland was determined the following way: %GFP<sup>+</sup> cells x Total number of cell per sample/15  
586 lymph glands.

587

#### 588 *qPCR analysis*

589 For qPCR analysis, 15 lymph glands were dissected and put immediately in RPL buffer  
590 (RNeasy Micro kit) and RNA was extracted following the standard procedure of the kit.  
591 Reverse transcription was performed on 250 µg of RNA using the High capacity reverse  
592 transcription kit from Applied Biosystems. Taqman qPCR assays were designed using the  
593 Universal Probe Library design center (Roche). SYBRgreen qPCR primers were selected  
594 from <http://www.flyrnai.org/flyprimerbank> (Hu et al., 2013). The primer sequences and the  
595 Universal ProbeLibrary probe number are listed in Table S4. Assays were designed such that  
596 the amplified regions did not overlap with sequences targeted by dsRNA. Taqman qPCR  
597 reactions were performed with the TaqMan® Real-Time PCR Master Mix and analyzed with  
598 the ViiA™ 7 Real-Time PCR System. SYBRgreen qPCR reactions were performed with the  
599 Fast SYBR Green Master Mix (Applied Biosystems) and analyzed with the Applied  
600 Biosystems StepOnePlus Real-time PCR system. The quantification of target genes was  
601 determined using the Ct method. Briefly, the Ct (threshold cycle) values of target genes were  
602 normalized to a reference gene (Act5C unless indicated otherwise) where  $\Delta Ct = Ct_{\text{target}} -$   
603  $Ct_{\text{Act5C}}$ , and then compared with a calibrator sample (RLuc RNAi or WT) where  $\Delta\Delta Ct =$

604  $\Delta Ct_{\text{Sample}} - \Delta Ct_{\text{Calibrator}}$ . Relative expression (RQ) was calculated with the formula  $RQ = 2^{-\Delta\Delta CT}$ .

605 The RNAi efficiencies measured for all lines tested are listed in Table S5.

606

### 607 *Transcriptome analysis*

608 RNA-seq libraries were prepared from 200 ng of RNA using the KAPA stranded mRNA-seq  
609 Kit (KAPABiosystems). Sequencing was performed on an Illumina HiSeq2000 instrument  
610 using TruSeq SBS v3 chemistry. Sequences were trimmed for sequencing adapters and then  
611 aligned to the reference *D. melanogaster* BDGP6 genome using the STAR software (version  
612 2.7.1a). Expression values were estimated for genes and transcripts defined in Ensembl  
613 (release 99) using the RSEM algorithm (version 1.2.28) and then normalized across samples  
614 as TPM values. The sequenced data from these experiments are available at Gene Expression  
615 Omnibus accession: GSE148035.

### 616 *Statistics*

617 Statistical analysis was performed using Graphpad Prism. The data was assumed to be  
618 normally distributed. For multiple comparisons, one-way ANOVA with Bonferroni post-  
619 testing was used. Data shown as normalized to WT/control has been normalized to the mean  
620 of all the control values from the different experiments. The exception is qPCR experiments  
621 to test for target knockdown, where target expression was set to 1 in each experiment.

622 **Acknowledgements**

623 We would like to thank all the researchers who generously shared reagents: H. Okano, M.  
624 Balakireva, S. Goto, G.M. Rubin, A. Saltiel, N. Perrimon, P. Rorth, I. Ando, B. Shilo and  
625 E.Bach. Stocks obtained from the Bloomington Drosophila Stock Center (NIH  
626 P40OD018537) and Vienna Drosophila Resource Center (VDRC) were used in this study.  
627 Several antibodies were obtained from the Developmental Studies Hybridoma Bank created  
628 by the NICHD of the NIH and maintained at The University of Iowa. Several plasmids were  
629 obtained from Drosophila Genomics Resource Center, supported by NIH grant  
630 2P40OD010949. We thank K.M. Dahlgren and F. Lussier for technical assistance. We thank  
631 Dr. Ellen Tenstad/Science Shaped for designing the graphical figures. The Bioimaging,  
632 Bioinformatics, Flow cytometry, and Genomics core facilities of IRIC as well as the core  
633 facilities for Advanced Light Microscopy and Flow Cytometry at Oslo University Hospital,  
634 Gaustad and Montebello nodes, are acknowledged for access, help and services. H.K. was  
635 supported by fellowship 221552/F20 from the Research Council of Norway and fellowship  
636 2017062 from the South-Eastern Norway Regional Health Authority. J.M.E. was supported  
637 by Norwegian Cancer Society projects 4487303, 182524 and 208012, and Norwegian  
638 Research Council projects 261936 and 294916. M.T. is recipient of Tier 1 Canada Research  
639 Chair in Intracellular Signaling. This work was supported by the Research Council of Norway  
640 through its Centres of Excellence funding scheme, project number 262652. This project was  
641 also supported by funds from the Canadian Institutes for Health Research (MOP-15375 and  
642 FDN 388023) to M.T.

643

644 **Competing interests**

645 The authors declare that no competing interests exist.

## 646 References

- 647 Abe, M., Setoguchi, Y., Tanaka, T., Awano, W., Takahashi, K., Ueda, R., . . . Goto, S. (2009). Membrane  
648 protein location-dependent regulation by PI3K (III) and rabenosyn-5 in *Drosophila* wing cells.  
649 *PLoS One*, *4*(10), e7306. doi:10.1371/journal.pone.0007306
- 650 Asha, H., Nagy, I., Kovacs, G., Stetson, D., Ando, I., & Dearolf, C. R. (2003). Analysis of Ras-induced  
651 overproliferation in *Drosophila* hemocytes. *Genetics*, *163*(1), 203-215. Retrieved from  
652 <https://www.ncbi.nlm.nih.gov/pubmed/12586708>
- 653 Baldeosingh, R., Gao, H., Wu, X., & Fossett, N. (2018). Hedgehog signaling from the Posterior  
654 Signaling Center maintains U-shaped expression and a prohemocyte population in *Drosophila*.  
655 *Dev Biol*, *441*(1), 132-145. doi:10.1016/j.ydbio.2018.06.020
- 656 Ballmer-Hofer, K., Andersson, A. E., Ratcliffe, L. E., & Berger, P. (2011). Neuropilin-1 promotes VEGFR-  
657 2 trafficking through Rab11 vesicles thereby specifying signal output. *Blood*, *118*(3), 816-826.  
658 doi:10.1182/blood-2011-01-328773
- 659 Banerjee, U., Girard, J. R., Goins, L. M., & Spratford, C. M. (2019). *Drosophila* as a Genetic Model for  
660 Hematopoiesis. *Genetics*, *211*(2), 367-417. doi:10.1534/genetics.118.300223
- 661 Basler, K., Christen, B., & Hafen, E. (1991). Ligand-independent activation of the sevenless receptor  
662 tyrosine kinase changes the fate of cells in the developing *Drosophila* eye. *Cell*, *64*(6), 1069-  
663 1081. Retrieved from <https://www.ncbi.nlm.nih.gov/pubmed/2004416>
- 664 Benmimoun, B., Polesello, C., Waltzer, L., & Haenlin, M. (2012). Dual role for Insulin/TOR signaling in  
665 the control of hematopoietic progenitor maintenance in *Drosophila*. *Development*, *139*(10),  
666 1713-1717. doi:10.1242/dev.080259
- 667 Bischof, J., Maeda, R. K., Hediger, M., Karch, F., & Basler, K. (2007). An optimized transgenesis system  
668 for *Drosophila* using germ-line-specific phiC31 integrases. *Proc Natl Acad Sci U S A*, *104*(9),  
669 3312-3317. doi:10.1073/pnas.0611511104
- 670 Boulet, M., Miller, M., Vandel, L., & Waltzer, L. (2018). From *Drosophila* Blood Cells to Human  
671 Leukemia. *Adv Exp Med Biol*, *1076*, 195-214. doi:10.1007/978-981-13-0529-0\_11
- 672 Cancer Genome Atlas Research, N., Ley, T. J., Miller, C., Ding, L., Raphael, B. J., Mungall, A. J., . . . Eley,  
673 G. (2013). Genomic and epigenomic landscapes of adult de novo acute myeloid leukemia. *N*  
674 *Engl J Med*, *368*(22), 2059-2074. doi:10.1056/NEJMoa1301689
- 675 Carmena, A., Makarova, A., & Speicher, S. (2011). The Rap1-Rgl-Ral signaling network regulates  
676 neuroblast cortical polarity and spindle orientation. *Journal of Cell Biology*, *195*(4), 553-562.  
677 Retrieved from <http://jcb.rupress.org/cgi/pmidlookup?view=long&pmid=22084305>
- 678 Cascone, I., Selimoglu, R., Ozdemir, C., Del Nery, E., Yeaman, C., White, M., & Camonis, J. (2008).  
679 Distinct roles of RalA and RalB in the progression of cytokinesis are supported by distinct  
680 RalGEFs. *EMBO J*, *27*(18), 2375-2387. doi:10.1038/emboj.2008.166
- 681 Ceriani, M., Amigoni, L., Scanduzzi, C., Berruti, G., & Martegani, E. (2010). The PH-PxxP domain of  
682 RalGPS2 promotes PC12 cells differentiation acting as a dominant negative for RalA GTPase  
683 activation. *Neurosci Res*, *66*(3), 290-298. doi:10.1016/j.neures.2009.11.013
- 684 Ceriani, M., Scanduzzi, C., Amigoni, L., Tisi, R., Berruti, G., & Martegani, E. (2007). Functional analysis  
685 of RalGPS2, a murine guanine nucleotide exchange factor for RalA GTPase. *Exp Cell Res*,  
686 *313*(11), 2293-2307. doi:10.1016/j.yexcr.2007.03.016
- 687 Chen, Q., Quan, C., Xie, B., Chen, L., Zhou, S., Toth, R., . . . Chen, S. (2014). GARNL1, a major RalGAP  
688 alpha subunit in skeletal muscle, regulates insulin-stimulated RalA activation and GLUT4  
689 trafficking via interaction with 14-3-3 proteins. *Cell Signal*, *26*(8), 1636-1648.  
690 doi:10.1016/j.cellsig.2014.04.012
- 691 Chen, X. W., Leto, D., Chiang, S. H., Wang, Q., & Saltiel, A. R. (2007). Activation of RalA is required for  
692 insulin-stimulated Glut4 trafficking to the plasma membrane via the exocyst and the motor  
693 protein Myo1c. *Dev Cell*, *13*(3), 391-404. doi:10.1016/j.devcel.2007.07.007

- 694 Chen, X. W., Leto, D., Xiong, T., Yu, G., Cheng, A., Decker, S., & Saltiel, A. R. (2011). A Ral GAP complex  
695 links PI 3-kinase/Akt signaling to RalA activation in insulin action. *Mol Biol Cell*, 22(1), 141-152.  
696 doi:10.1091/mbc.E10-08-0665
- 697 Cherbas, L., Willingham, A., Zhang, D., Yang, L., Zou, Y., Eads, B. D., . . . Cherbas, P. (2011). The  
698 transcriptional diversity of 25 Drosophila cell lines. *Genome Res*, 21(2), 301-314.  
699 doi:10.1101/gr.112961.110
- 700 Cho, B., & Fischer, J. A. (2011). Ral GTPase promotes asymmetric Notch activation in the Drosophila  
701 eye in response to Frizzled/PCP signaling by repressing ligand-independent receptor  
702 activation. *Development*, 138(7), 1349-1359. Retrieved from  
703 <http://dev.biologists.org/cgi/pmidlookup?view=long&pmid=21350007>
- 704 Choudhary, C., Olsen, J. V., Brandts, C., Cox, J., Reddy, P. N., Bohmer, F. D., . . . Serve, H. (2009).  
705 Mislocalized activation of oncogenic RTKs switches downstream signaling outcomes. *Mol Cell*,  
706 36(2), 326-339. doi:10.1016/j.molcel.2009.09.019
- 707 Clemens, J. C., Worby, C. A., Simonson-Leff, N., Muda, M., Maehama, T., Hemmings, B. A., & Dixon, J.  
708 E. (2000). Use of double-stranded RNA interference in Drosophila cell lines to dissect signal  
709 transduction pathways. *Proc Natl Acad Sci U S A*, 97(12), 6499-6503.  
710 doi:10.1073/pnas.110149597
- 711 Cox, A. D., & Der, C. J. (2010). Ras history: The saga continues. *Small GTPases*, 1(1), 2-27.  
712 doi:10.4161/sgtp.1.1.12178
- 713 D'Aloia, A., Berruti, G., Costa, B., Schiller, C., Ambrosini, R., Pastori, V., . . . Ceriani, M. (2018). RalGPS2  
714 is involved in tunneling nanotubes formation in 5637 bladder cancer cells. *Exp Cell Res*,  
715 362(2), 349-361. doi:10.1016/j.yexcr.2017.11.036
- 716 de Bruyn, K. M., de Rooij, J., Wolthuis, R. M., Rehmann, H., Wesenbeek, J., Cool, R. H., . . . Bos, J. L.  
717 (2000). RalGEF2, a pleckstrin homology domain containing guanine nucleotide exchange  
718 factor for Ral. *J Biol Chem*, 275(38), 29761-29766. doi:10.1074/jbc.M001160200
- 719 Demoulin, J. B., & Montano-Almendras, C. P. (2012). Platelet-derived growth factors and their  
720 receptors in normal and malignant hematopoiesis. *Am J Blood Res*, 2(1), 44-56. Retrieved  
721 from <http://www.ncbi.nlm.nih.gov/pubmed/22432087>
- 722 Dietzl, G., Chen, D., Schnorrer, F., Su, K. C., Barinova, Y., Fellner, M., . . . Dickson, B. J. (2007). A  
723 genome-wide transgenic RNAi library for conditional gene inactivation in Drosophila. *Nature*,  
724 448(7150), 151-156. doi:10.1038/nature05954
- 725 Dragojlovic-Munther, M., & Martinez-Agosto, J. A. (2012). Multifaceted roles of PTEN and TSC  
726 orchestrate growth and differentiation of Drosophila blood progenitors. *Development*,  
727 139(20), 3752-3763. doi:10.1242/dev.074203
- 728 Duchek, P., Somogyi, K., Jékely, G., Beccari, S., & Rørth, P. (2001). Guidance of Cell Migration by the  
729 *Drosophila* PDGF/VEGF Receptor. *Cell*, 107(1), 17-26. doi:10.1016/S0092-  
730 8674(01)00502-5
- 731 Ekas, L. A., Cardozo, T. J., Flaherty, M. S., McMillan, E. A., Gonsalves, F. C., & Bach, E. A. (2010).  
732 Characterization of a dominant-active STAT that promotes tumorigenesis in Drosophila. *Dev*  
733 *Biol*, 344(2), 621-636. doi:10.1016/j.ydbio.2010.05.497
- 734 Ferguson, G. B., & Martinez-Agosto, J. A. (2017). The TEAD family transcription factor Scalloped  
735 regulates blood progenitor maintenance and proliferation in Drosophila through  
736 PDGF/VEGFR receptor (Pvr) signaling. *Dev Biol*, 425(1), 21-32.  
737 doi:10.1016/j.ydbio.2017.03.016
- 738 Ferro, E., & Trabalzini, L. (2010). RalGDS family members couple Ras to Ral signalling and that's not all.  
739 *Cell Signal*, 22(12), 1804-1810. doi:10.1016/j.cellsig.2010.05.010
- 740 Frische, E. W., & Zwartkuis, F. J. (2010). Rap1, a mercenary among the Ras-like GTPases. *Dev Biol*,  
741 340(1), 1-9. doi:10.1016/j.ydbio.2009.12.043
- 742 Gentry, L. R., Martin, T. D., Reiner, D. J., & Der, C. J. (2014). Ral small GTPase signaling and  
743 oncogenesis: More than just 15minutes of fame. *Biochim Biophys Acta*, 1843(12), 2976-2988.  
744 doi:10.1016/j.bbamcr.2014.09.004

- 745 Gerber, H. P., & Ferrara, N. (2003). The role of VEGF in normal and neoplastic hematopoiesis. *J Mol*  
746 *Med (Berl)*, *81*(1), 20-31. doi:10.1007/s00109-002-0397-4
- 747 Hellberg, C., Schmees, C., Karlsson, S., Ahgren, A., & Heldin, C. H. (2009). Activation of protein kinase  
748 C alpha is necessary for sorting the PDGF beta-receptor to Rab4a-dependent recycling. *Mol*  
749 *Biol Cell*, *20*(12), 2856-2863. doi:10.1091/mbc.E08-12-1228
- 750 Holly, R. M., Mavor, L. M., Zuo, Z., & Blankenship, J. T. (2015). A rapid, membrane-dependent  
751 pathway directs furrow formation through RalA in the early *Drosophila* embryo.  
752 *Development*, *142*(13), 2316-2328. doi:10.1242/dev.120998
- 753 Honti, V., Cinege, G., Csordas, G., Kurucz, E., Zsamboki, J., Evans, C. J., . . . Ando, I. (2013). Variation of  
754 NimC1 expression in *Drosophila* stocks and transgenic strains. *Fly (Austin)*, *7*(4), 263-266.  
755 doi:10.4161/fly.25654
- 756 Honti, V., Csordas, G., Kurucz, E., Markus, R., & Ando, I. (2014). The cell-mediated immunity of  
757 *Drosophila melanogaster*: hemocyte lineages, immune compartments, microanatomy and  
758 regulation. *Dev Comp Immunol*, *42*(1), 47-56. doi:10.1016/j.dci.2013.06.005
- 759 Horowitz, A., & Seerapu, H. R. (2012). Regulation of VEGF signaling by membrane traffic. *Cell Signal*,  
760 *24*(9), 1810-1820. doi:<https://doi.org/10.1016/j.cellsig.2012.05.007>
- 761 Hu, Y., Sopko, R., Foos, M., Kelley, C., Flockhart, I., Ammeux, N., . . . Mohr, S. E. (2013). FlyPrimerBank:  
762 an online database for *Drosophila melanogaster* gene expression analysis and knockdown  
763 evaluation of RNAi reagents. *G3 (Bethesda)*, *3*(9).
- 764 Janssens, K., Sung, H. H., & Rorth, P. (2010). Direct detection of guidance receptor activity during  
765 border cell migration. *Proc Natl Acad Sci U S A*, *107*(16), 7323-7328.  
766 doi:10.1073/pnas.0915075107
- 767 Jekely, G., Sung, H. H., Luque, C. M., & Rorth, P. (2005). Regulators of endocytosis maintain localized  
768 receptor tyrosine kinase signaling in guided migration. *Dev Cell*, *9*(2), 197-207.  
769 doi:10.1016/j.devcel.2005.06.004
- 770 Joneson, T., White, M. A., Wigler, M. H., & Bar-Sagi, D. (1996). Stimulation of membrane ruffling and  
771 MAP kinase activation by distinct effectors of RAS. *Science*, *271*(5250), 810-812. Retrieved  
772 from <https://www.ncbi.nlm.nih.gov/pubmed/8628998>
- 773 Jung, S. H., Evans, C. J., Uemura, C., & Banerjee, U. (2005). The *Drosophila* lymph gland as a  
774 developmental model of hematopoiesis. *Development*, *132*(11), 2521-2533.  
775 doi:10.1242/dev.01837
- 776 Karim, F. D., & Rubin, G. M. (1998). Ectopic expression of activated Ras1 induces hyperplastic growth  
777 and increased cell death in *Drosophila* imaginal tissues. *Development*, *125*(1), 1-9. Retrieved  
778 from <http://www.ncbi.nlm.nih.gov/pubmed/9389658>
- 779 Kawada, K., Upadhyay, G., Ferandon, S., Janarthanan, S., Hall, M., Vilardaga, J. P., & Yajnik, V. (2009).  
780 Cell migration is regulated by platelet-derived growth factor receptor endocytosis. *Mol Cell*  
781 *Biol*, *29*(16), 4508-4518. doi:10.1128/mcb.00015-09
- 782 Khadilkar, R. J., Ray, A., Chetan, D. R., Sinha, A. R., Magadi, S. S., Kulkarni, V., & Inamdar, M. S. (2017).  
783 Differential modulation of the cellular and humoral immune responses in *Drosophila* is  
784 mediated by the endosomal ARF1-Asrij axis. *Sci Rep*, *7*(1), 118. doi:10.1038/s41598-017-  
785 00118-7
- 786 Khadilkar, R. J., Rodrigues, D., Mote, R. D., Sinha, A. R., Kulkarni, V., Magadi, S. S., & Inamdar, M. S.  
787 (2014). ARF1-GTP regulates Asrij to provide endocytic control of *Drosophila* blood cell  
788 homeostasis. *Proc Natl Acad Sci U S A*, *111*(13), 4898-4903. doi:10.1073/pnas.1303559111
- 789 Kim, S., Nahm, M., Kim, N., Kwon, Y., Kim, J., Choi, S., . . . Lee, S. (2017). Graf regulates hematopoiesis  
790 through GEEC endocytosis of EGFR. *Development*, *144*(22), 4159. doi:10.1242/dev.153288
- 791 Korolchuk, V. I., Schütz, M. M., Gómez-Llorente, C., Rocha, J., Lansu, N. R., Collins, S. M., . . . Kane, C. J.  
792 (2007). &lt;em&gt;&lt;/em&gt;<em&gt;&lt;/em&gt; Vps35 function is necessary for normal endocytic  
793 trafficking and actin cytoskeleton organisation. *J Cell Sci*, *120*(24), 4367.  
794 doi:10.1242/jcs.012336

- 795 Kulkarni, V., Khadilkar, R. J., Magadi, S. S., & Inamdar, M. S. (2011). Asrij maintains the stem cell niche  
796 and controls differentiation during Drosophila lymph gland hematopoiesis. *PLoS One*, 6(11),  
797 e27667. doi:10.1371/journal.pone.0027667
- 798 Kurucz, E., Markus, R., Zsomboki, J., Folkl-Medzihradzsky, K., Darula, Z., Vilmos, P., . . . Ando, I. (2007).  
799 Nimrod, a putative phagocytosis receptor with EGF repeats in Drosophila plasmatocytes. *Curr*  
800 *Biol*, 17(7), 649-654. doi:10.1016/j.cub.2007.02.041
- 801 Kurucz, E., Vaczi, B., Markus, R., Laurinyecz, B., Vilmos, P., Zsomboki, J., . . . Ando, I. (2007). Definition  
802 of Drosophila hemocyte subsets by cell-type specific antigens. *Acta Biol Hung*, 58 Suppl, 95-  
803 111. doi:10.1556/ABiol.58.2007.Suppl.8
- 804 Lanahan, A. A., Hermans, K., Claes, F., Kerley-Hamilton, J. S., Zhuang, Z. W., Giordano, F. J., . . . Simons,  
805 M. (2010). VEGF receptor 2 endocytic trafficking regulates arterial morphogenesis. *Dev Cell*,  
806 18(5), 713-724. doi:10.1016/j.devcel.2010.02.016
- 807 Lennartsson, J., Wardega, P., Engström, U., Hellman, U., & Heldin, C.-H. (2006). Alix Facilitates the  
808 Interaction between c-Cbl and Platelet-derived Growth Factor  $\beta$ -Receptor and Thereby  
809 Modulates Receptor Down-regulation. *Journal of Biological Chemistry*, 281(51), 39152-39158.  
810 doi:10.1074/jbc.M608489200
- 811 Letourneau, M., Lapraz, F., Sharma, A., Vanzo, N., Waltzer, L., & Crozatier, M. (2016). Drosophila  
812 hematopoiesis under normal conditions and in response to immune stress. *FEBS Lett*,  
813 590(22), 4034-4051. doi:10.1002/1873-3468.12327
- 814 Mandal, L., Martinez-Agosto, J. A., Evans, C. J., Hartenstein, V., & Banerjee, U. (2007). A Hedgehog-  
815 and Antennapedia-dependent niche maintains Drosophila haematopoietic precursors.  
816 *Nature*, 446(7133), 320-324. doi:10.1038/nature05585
- 817 Miaczynska, M. (2013). Effects of membrane trafficking on signaling by receptor tyrosine kinases.  
818 *Cold Spring Harbor perspectives in biology*, 5(11), a009035-a009035.  
819 doi:10.1101/cshperspect.a009035
- 820 Mirey, G., Balakireva, M., L'Hoste, S., Rosse, C., Voegeling, S., & Camonis, J. (2003). A Ral guanine  
821 exchange factor-Ral pathway is conserved in Drosophila melanogaster and sheds new light  
822 on the connectivity of the Ral, Ras, and Rap pathways. *Mol Cell Biol*, 23(3), 1112-1124.  
823 Retrieved from <http://www.ncbi.nlm.nih.gov/pubmed/12529414>
- 824 Mondal, B. C., Mukherjee, T., Mandal, L., Evans, C. J., Sinenko, S. A., Martinez-Agosto, J. A., &  
825 Banerjee, U. (2011). Interaction between differentiating cell- and niche-derived signals in  
826 hematopoietic progenitor maintenance. *Cell*, 147(7), 1589-1600.  
827 doi:10.1016/j.cell.2011.11.041
- 828 Mondal, B. C., Shim, J., Evans, C. J., & Banerjee, U. (2014). Pvr expression regulators in equilibrium  
829 signal control and maintenance of Drosophila blood progenitors. *Elife*, 3, e03626.  
830 doi:10.7554/eLife.03626
- 831 Muratoglu, S. C., Mikhailenko, I., Newton, C., Migliorini, M., & Strickland, D. K. (2010). Low density  
832 lipoprotein receptor-related protein 1 (LRP1) forms a signaling complex with platelet-derived  
833 growth factor receptor-beta in endosomes and regulates activation of the MAPK pathway. *J*  
834 *Biol Chem*, 285(19), 14308-14317. doi:10.1074/jbc.M109.046672
- 835 Nakayama, A., Nakayama, M., Turner, C. J., Höing, S., Lepore, J. J., & Adams, R. H. (2013). Ephrin-B2  
836 controls PDGFR $\beta$  internalization and signaling. *Genes Dev*, 27(23), 2576-2589.  
837 doi:10.1101/gad.224089.113
- 838 Papini, D., Langemeyer, L., Abad, M. A., Kerr, A., Samejima, I., Evers, P. A., . . . Earnshaw, W. C. (2015).  
839 TD-60 links RalA GTPase function to the CPC in mitosis. *Nat Commun*, 6, 7678.  
840 doi:10.1038/ncomms8678
- 841 Powers, S., O'Neill, K., & Wigler, M. (1989). Dominant yeast and mammalian RAS mutants that  
842 interfere with the CDC25-dependent activation of wild-type RAS in *Saccharomyces cerevisiae*.  
843 *Mol Cell Biol*, 9(2), 390-395. doi:10.1128/mcb.9.2.390
- 844 Quilliam, L. A. (2006). Specificity and expression of RalGPS as RalGEFs. *Methods Enzymol*, 407, 108-  
845 114. doi:10.1016/S0076-6879(05)07010-2



- 846 Rebhun, J. F., Chen, H., & Quilliam, L. A. (2000). Identification and characterization of a new family of  
847 guanine nucleotide exchange factors for the ras-related GTPase Ral. *J Biol Chem*, 275(18),  
848 13406-13410. Retrieved from <http://www.ncbi.nlm.nih.gov/pubmed/10747847>
- 849 Rosin, D., Schejter, E., Volk, T., & Shilo, B. Z. (2004). Apical accumulation of the Drosophila  
850 PDGF/VEGF receptor ligands provides a mechanism for triggering localized actin  
851 polymerization. *Development*, 131(9), 1939-1948. doi:10.1242/dev.01101
- 852 Sanchez Bosch, P., Makhijani, K., Herboso, L., Gold, K. S., Baginsky, R., Woodcock, K. J., . . . Bruckner,  
853 K. (2019). Adult Drosophila Lack Hematopoiesis but Rely on a Blood Cell Reservoir at the  
854 Respiratory Epithelia to Relay Infection Signals to Surrounding Tissues. *Dev Cell*, 51(6), 787-  
855 803.e785. doi:10.1016/j.devcel.2019.10.017
- 856 Sawamoto, K., Winge, P., Koyama, S., Hirota, Y., Yamada, C., Miyao, S., . . . Okano, H. (1999). The  
857 Drosophila Ral GTPase regulates developmental cell shape changes through the Jun NH(2)-  
858 terminal kinase pathway. *J Cell Biol*, 146(2), 361-372. Retrieved from  
859 <http://www.ncbi.nlm.nih.gov/pubmed/10427090>
- 860 Schweitzer, R., Shaharabany, M., Seger, R., & Shilo, B. Z. (1995). Secreted Spitz triggers the DER  
861 signaling pathway and is a limiting component in embryonic ventral ectoderm determination.  
862 *Genes Dev*, 9(12), 1518-1529. Retrieved from  
863 <http://www.ncbi.nlm.nih.gov/pubmed/7601354>
- 864 Shim, J., Mukherjee, T., & Banerjee, U. (2012). Direct sensing of systemic and nutritional signals by  
865 haematopoietic progenitors in Drosophila. *Nat Cell Biol*, 14(4), 394-400.  
866 doi:10.1038/ncb2453
- 867 Shirakawa, R., Fukai, S., Kawato, M., Higashi, T., Kondo, H., Ikeda, T., . . . Horiuchi, H. (2009). Tuberosus  
868 sclerosis tumor suppressor complex-like complexes act as GTPase-activating proteins for Ral  
869 GTPases. *J Biol Chem*, 284(32), 21580-21588. doi:10.1074/jbc.M109.012112
- 870 Shrivage, B. V., Hill, J. H., Powers, C. M., Wu, L., & Baehrecke, E. H. (2013). Atg6 is required for  
871 multiple vesicle trafficking pathways and hematopoiesis in Drosophila. *Development*, 140(6),  
872 1321-1329. doi:10.1242/dev.089490
- 873 Takai, Y., Sasaki, T., & Matozaki, T. (2001). Small GTP-binding proteins. *Physiol Rev*, 81(1), 153-208.  
874 doi:10.1152/physrev.2001.81.1.153
- 875 Tanaka, T., Goto, K., & Iino, M. (2017). Diverse Functions and Signal Transduction of the Exocyst  
876 Complex in Tumor Cells. *J Cell Physiol*, 232(5), 939-957. doi:10.1002/jcp.25619
- 877 Therrien, M., Wong, A. M., & Rubin, G. M. (1998). CNK, a RAF-binding multidomain protein required  
878 for RAS signaling. *Cell*, 95(3), 343-353. Retrieved from  
879 <http://www.ncbi.nlm.nih.gov/pubmed/9814705>
- 880 Thurmond, J., Goodman, J. L., Strelets, V. B., Attrill, H., Gramates, L S., Marygold, S. J., . . . Consortium,  
881 t. F. (2018). FlyBase 2.0: the next generation. *Nucleic Acids Research*, 47(D1), D759-D765.  
882 doi:10.1093/nar/gky1003
- 883 Wang, Y., Pennock, S. D., Chen, X., Kazlauskas, A., & Wang, Z. (2004). Platelet-derived growth factor  
884 receptor-mediated signal transduction from endosomes. *J Biol Chem*, 279(9), 8038-8046.  
885 doi:10.1074/jbc.M311494200
- 886 White, M. A., Vale, T., Camonis, J. H., Schaefer, E., & Wigler, M. H. (1996). A role for the Ral guanine  
887 nucleotide dissociation stimulator in mediating Ras-induced transformation. *J Biol Chem*,  
888 271(28), 16439-16442. Retrieved from <http://www.ncbi.nlm.nih.gov/pubmed/8663585>
- 889 Wu, B., & Guo, W. (2015). The Exocyst at a Glance. *J Cell Sci*, 128(16), 2957-2964.  
890 doi:10.1242/jcs.156398
- 891 Yan, C., & Theodorescu, D. (2018). RAL GTPases: Biology and Potential as Therapeutic Targets in  
892 Cancer. *Pharmacol Rev*, 70(1), 1-11. doi:10.1124/pr.117.014415
- 893 Zettervall, C. J., Anderl, I., Williams, M. J., Palmer, R., Kurucz, E., Ando, I., & Hultmark, D. (2004). A  
894 directed screen for genes involved in Drosophila blood cell activation. *Proc Natl Acad Sci U S*  
895 *A*, 101(39), 14192-14197. doi:10.1073/pnas.0403789101
- 896 Zurovec, M., Dolezal, T., Gazi, M., Pavlova, E., & Bryant, P. J. (2002). Adenosine deaminase-related  
897 growth factors stimulate cell proliferation in *Drosophila* by depleting

898 extracellular adenosine. *Proceedings of the National Academy of Sciences*, 99(7), 4403-4408.  
899 doi:10.1073/pnas.062059699

900

901
