# Supplementary material for: Rala and the exocyst control Pvr trafficking and signaling to ensure lymph gland homeostasis in Drosophila melanogaster
Source: bioRxiv or medRxiv preprint supplement (doi:10.1101/2020.05.26.086140), 2020-05-26
Supplement: Supplementary file [file media-1.pdf]

## **Supplementary methods**

### *Quantification of phagocytic activity*

To evaluate phagocytic activity of larval circulating hemocytes, 15 larvae were washed in PBT 1%, transferred to PBS 1× and then dried on a paper towel. Cleaned larvae were bled in 110 µl of ESF921 medium and circulating hemocytes were counted using a hemocytometer. Equivalent numbers of hemocytes per sample and per genotype were incubated with 1 µl, 2.5 µl and 5 µl of Alexa-488 labeled E. Coli bioparticles (Life Technologies) for 20 min at room temperature. Fluorescence of extracellular bioparticles was quenched with 50 µl of 4% Trypan blue and thereafter the samples were immediately put on ice. Before analysis by flow cytometry (BD FACSCanto II), 300 µl of PBS 1× +2% FBS was added and samples were filtered into FACS tubes through a cell-strainer cap. The mean fluorescence intensity per cell was used as a parameter to calculate phagocytic activity. This protocol was adapted from (Neyen et al., 2014). For bioparticle preparation, 2 mg of bioparticle powder were vortexed in 2 ml of PBS 1× for 1 min and then passed 40 times through a 26-gauge needle. 20 µl aliquots were stored at -80 °C for later use.

## Supplementary references

- Abe, M., Y. Setoguchi, T. Tanaka, W. Awano, K. Takahashi, R. Ueda, A. Nakamura, and S. Goto. 2009. Membrane protein location-dependent regulation by PI3K (III) and rabenosyn-5 in *Drosophila* wing cells. *PLoS one*. 4:e7306.
- Duchek, P., K. Somogyi, G. Jékely, S. Beccari, and P. Rørth. 2001. Guidance of Cell Migration by the *Drosophila* PDGF/VEGF Receptor. *Cell*. 107:17-26.
- Ekas, L.A., T.J. Cardozo, M.S. Flaherty, E.A. McMillan, F.C. Gonsalves, and E.A. Bach. 2010. Characterization of a dominant-active STAT that promotes tumorigenesis in *Drosophila*. *Developmental biology*. 344:621-636.
- Honti, V., G. Cinege, G. Csordas, E. Kurucz, J. Zsomboki, C.J. Evans, U. Banerjee, and I. Ando. 2013. Variation of NimC1 expression in *Drosophila* stocks and transgenic strains. *Fly*. 7:263-266.
- Karim, F.D., and G.M. Rubin. 1998. Ectopic expression of activated Ras1 induces hyperplastic growth and increased cell death in *Drosophila* imaginal tissues. *Development*. 125:1-9.
- Mirey, G., M. Balakireva, S. L'Hoste, C. Rosse, S. Voegeling, and J. Camonis. 2003. A Ral guanine exchange factor-Ral pathway is conserved in *Drosophila melanogaster* and sheds new light on the connectivity of the Ral, Ras, and Rap pathways. *Molecular and cellular biology*. 23:1112-1124.
- Neyen, C., A.J. Bretscher, O. Binggeli, and B. Lemaitre. 2014. Methods to study *Drosophila* immunity. *Methods*. 68:116-128.
- Sawamoto, K., P. Winge, S. Koyama, Y. Hirota, C. Yamada, S. Miyao, S. Yoshikawa, M.H. Jin, A. Kikuchi, and H. Okano. 1999. The *Drosophila* Ral GTPase regulates developmental cell shape changes through the Jun NH(2)-terminal kinase pathway. *The Journal of cell biology*. 146:361-372.
