# Supplementary material for: Rala and the exocyst control Pvr trafficking and signaling to ensure lymph gland homeostasis in Drosophila melanogaster
Source: bioRxiv or medRxiv preprint supplement (doi:10.1101/2020.05.26.086140), 2020-05-26
Supplement: Supplementary file [file media-2.pdf]

**Table S1: mRNA levels of Rala-related proteins in entire lymph glands**

| Gene name       | CG number | Average (TPM) | SD      |
|-----------------|-----------|---------------|---------|
| Act5C           | CG4027    | 2997,83       | 1019,04 |
| Atg1            | CG10967   | 16,50         | 1,83    |
| Atg12           | CG10861   | 19,65         | 3,10    |
| Atg16           | CG31033   | 14,47         | 1,00    |
| Atg18a          | CG7986    | 48,40         | 2,74    |
| Atg18b          | CG8678    | 6,99          | 0,86    |
| Atg4a           | CG4428    | 36,77         | 4,20    |
| Atg4b           | CG6194    | 8,98          | 1,46    |
| Atg5            | CG1643    | 20,90         | 1,47    |
| Atg6            | CG5429    | 21,10         | 1,56    |
| Atg7            | CG5489    | 13,29         | 3,54    |
| Atg8a           | CG32672   | 330,87        | 28,99   |
| Atg8b           | CG12334   | 0,00          | 0,00    |
| Exo70           | CG7127    | 20,05         | 0,98    |
| Exo84           | CG6095    | 20,19         | 0,84    |
| Gapdh1          | CG12055   | 336,53        | 35,30   |
| RalGAP $\alpha$ | CG5521    | 7,37          | 1,03    |
| RalGAP $\beta$  | CG34408   | 16,91         | 1,35    |
| RalGPS          | CG5522    | 18,78         | 1,99    |
| Pi3K59F         | CG5373    | 11,56         | 0,57    |
| Pvr             | CG8222    | 135,20        | 13,00   |
| Rab11           | CG5771    | 449,53        | 67,77   |
| Rala            | CG2849    | 40,86         | 4,77    |
| Ras85D          | CG9375    | 94,13         | 9,72    |
| Rgl             | CG8865    | 4,88          | 0,91    |
| Rlip/RalBP1     | CG11622   | 15,14         | 0,98    |
| rl/MAPK         | CG12559   | 65,61         | 2,02    |
| RtGEF           | CG10043   | 15,46         | 0,94    |
| Sec10           | CG6159    | 25,31         | 3,01    |
| Sec15           | CG7034    | 13,56         | 1,23    |
| Sec3            | CG3885    | 17,10         | 1,66    |
| Sec5            | CG8843    | 16,97         | 0,92    |
| Sec6            | CG5341    | 15,00         | 0,53    |
| Sec8            | CG2095    | 41,70         | 1,65    |
| Vps15           | CG9746    | 8,50          | 0,54    |
