# Supplementary material for: Rala and the exocyst control Pvr trafficking and signaling to ensure lymph gland homeostasis in Drosophila melanogaster
Source: bioRxiv or medRxiv preprint supplement (doi:10.1101/2020.05.26.086140), 2020-05-26
Supplement: Supplementary file [file media-3.pdf]

**Table S2: Fly stocks used**

| Name                            | Obtained from | Stock number | Comment/Reference       |
|---------------------------------|---------------|--------------|-------------------------|
| <i>hmlΔ-Gal4, UAS-2XeGFP</i>    | BDSC          | BL30140      |                         |
| <i>hmlΔ-Gal4, UAS-2XeGFP</i>    | BDSC          | BL30142      |                         |
| <i>R3-hmlΔ-Gal4, UAS-2xeGFP</i> |               |              | (Honti et al., 2013)    |
| P{w[+mC]=Cg-GAL4.A, UAS-GFP     | BDSC          | BL7011       | Recombined with UAS-GFP |
| UAS-RNAi Rala #1                | VDRC          | 43622        |                         |
| UAS-RNAi Rala #2                | VDRC          | 105296       |                         |
| UAS-RNAi Rala #3                | BDSC          | BL28950      |                         |
| UAS-RNAi Rala #4                | BDSC          | BL34375      |                         |
| UAS-RNAi Sec5 #1                | VDRC          | 28873        |                         |
| UAS-RNAi Sec5 #2                | VDRC          | 28874        |                         |
| UAS-RNAi Sec5 #3                | BDSC          | BL27526      |                         |
| UAS-RNAi Rlip #1                | VDRC          | 101635       |                         |
| UAS-RNAi Rlip #2                | VDRC          | 16244        |                         |
| UAS-RNAi Exo84 #1               | VDRC          | 108650       |                         |
| UAS-RNAi Exo84 #2               | BDSC          | BL28712      |                         |
| UAS-RNAi Exo84 #3               | VDRC          | 30112        |                         |
| UAS-RNAi Sec6 #1                | VDRC          | 105836       |                         |
| UAS-RNAi Sec6 #2                | VDRC          | 22079        |                         |
| UAS-RNAi Sec8 #1                | VDRC          | 45032        |                         |
| UAS-RNAi Sec8 #2                | VDRC          | 105653       |                         |
| UAS-RNAi Sec15 #1               | VDRC          | 35162        |                         |
| UAS-RNAi Sec15 #2               | VDRC          | 35161        |                         |
| UAS-RNAi RalGPS/CG5522 #1       | VDRC          | 40595        |                         |
| UAS-RNAi RalGPS/CG5522 #2       | VDRC          | 40596        |                         |
| UAS-RasV12 on 2nd               |               |              | (Karim and Rubin, 1998) |
| UAS-RasV12 on 3rd               |               |              | (Karim and Rubin, 1998) |
| UAS-RasV12_S35                  |               |              | (Karim and Rubin, 1998) |
| UAS-RasV12_G37 on 2nd           |               |              | (Karim and Rubin, 1998) |
| UAS-RasV12_G37 on X             |               |              | (Karim and Rubin, 1998) |
| UAS-RasV12_C40                  |               |              | (Karim and Rubin, 1998) |
| UAS-RalaWT                      |               |              | (Sawamoto et al., 1999) |
| UAS-RalaG20V                    |               |              | (Sawamoto et al., 1999) |
| UAS-RalaS25N                    |               |              | (Sawamoto et al., 1999) |
| UAS-Rgl                         |               |              | (Mirey et al., 2003)    |
| UAS-RalGPS                      |               |              | This study              |
| UAS-RNAi mapk #1                | BDSC          | BL36058      |                         |
| UAS-RNAi mapk #2                | VDRC          | 43123        |                         |
| UAS-RNAi mapk #3                | BDSC          | BL34855      |                         |
| UAS-RNAi Atg1                   | BDSC          | BL26731      |                         |
| UAS-RNAi Atg8a                  | VDRC          | 43096        |                         |
| UAS-RNAi Atg8b                  | VDRC          | 17079        |                         |
| UAS-RNAi Atg7                   | BDSC          | BL27707      |                         |
| UAS-RNAi Atg5                   | BDSC          | BL27551      |                         |
| UAS-RNAi Atg12                  | BDSC          | BL27552      |                         |
| UAS-RNAi Atg4                   | BDSC          | BL35740      |                         |
| UAS-RNAi Atg16                  | BDSC          | BL28060      |                         |
| UAS-RNAi Vps34                  | VDRC          | 107602       |                         |

|                   |      |         |                       |
|-------------------|------|---------|-----------------------|
| UAS-RNAi Vps15    |      |         | (Abe et al., 2009)    |
| UAS-RNAi Atg6     | BDSC | BL35741 |                       |
| UAS-RNAi Atg18    | BDSC | BL34714 |                       |
| UAS-RNAi Rab11 #1 | BDSC | BL27730 |                       |
| UAS-RNAi Rab11 #2 | VDRC | 108297  |                       |
| UAS-PVR           |      |         | (Duchek et al., 2001) |
| UAS-Stat92EΔNΔC   |      |         | (Ekas et al., 2010)   |
| UAS-RNAi PVR      | VDRC | 105353  |                       |
