# Supplementary material for: Rala and the exocyst control Pvr trafficking and signaling to ensure lymph gland homeostasis in Drosophila melanogaster
Source: bioRxiv or medRxiv preprint supplement (doi:10.1101/2020.05.26.086140), 2020-05-26
Supplement: Supplementary file [file media-4.pdf]

**Table S3: dsRNAs for RNAi in S2 cell culture**

| <b>Target</b>               | <b>5'primer</b>       | <b>3'primer</b>       | <b>Reference</b> |
|-----------------------------|-----------------------|-----------------------|------------------|
| RLuc (control)              | TGCTGGACAGCTTCATCAAC  | ATGTCCTCCTCGATGTCTGG  | our design       |
| Rala                        | CTTTCGTCGTCTGTGATGGA  | GCGCTCCACAAGGTCATAAT  | DRSC27866        |
| RalGPS (CG5522) #1          | CCAATGGACACACTTTGCAC  | ATGATTCGGTCTTGGAGCAC  | DRSC27139        |
| RalGPS (CG5522) #2          | GTCCAAAAGCTCGTGTGGTT  | GCAAGAATTCCATCGGTTGT  | DRSC37170        |
| Rgl #1                      | CATAATAGAAGCCGTCGATG  | CGGAGCTGGCGAATATTT    | our design       |
| Rgl #2                      | AATGGTCATTCGTGGCTTTC  | CAGGATACTGGACACCACCC  | our design       |
| Rgl RA                      | CAGGCAGACGCATAGACGTA  | GAGATTTCCACGGATGCACT  | our design       |
| RalGAP $\alpha$ (CG5521) #1 | TTTGTCCGCCAGCTCTAACT  | CTTCGATGTCAGTTGCTCCA  | DRSC30087        |
| RalGAP $\alpha$ (CG5521) #2 | GGAGCATTACAGCTGGCTTAC | CTTGCTGGGACGCTTCTATC  | DRSC36444        |
| RalGAP $\beta$ (CG34408)    | CTGCAGCAGTTCATCCACTC  | GGTGACCCATTATGGCATTCC | DRSC28674        |
| TD-60 (CG9135) #1           | TCGGTTTCGGGCGTAATC    | ATTATTGCCGCAAGCAAAG   | DRSC03144        |
| TD-60 (CG9135) #2           | TTTTCGATACTCAGGGTCGG  | CAACACCGTGTGCGAGTAAC  | our design       |
