# Supplementary material for: Rala and the exocyst control Pvr trafficking and signaling to ensure lymph gland homeostasis in Drosophila melanogaster
Source: bioRxiv or medRxiv preprint supplement (doi:10.1101/2020.05.26.086140), 2020-05-26
Supplement: Supplementary file [file media-5.pdf]

**Table S4: qPCR assays**

| <b>Target</b>               | <b>Primer 1</b>          | <b>Primer 2</b>          | <b>Taqman probe #</b> |
|-----------------------------|--------------------------|--------------------------|-----------------------|
| Rala                        | gcaaccaggaattcagaga      | tcattcagatcgcacttggtg    | 18                    |
| Rala                        | gactacgagcccaccaagg      | tgcgaaagtagttatctctgatgg | 79                    |
| RalGPS (CG5522)             | ccacggataatctgctgtac     | tgctgctgctggttgaag       | 63                    |
| Rgl                         | cctgaagaaagtgcgatacca    | tgggaaatctcatcatctgagtc  | 76                    |
| Rgl-RA                      | gacaagaagcgcaaggagt      | tccgcctggagattatgtg      | 76                    |
| RalGAP $\alpha$<br>(CG5521) | ccgaggcgaatctaaaaca      | gcagaaggcacaggatcttc     | 46                    |
| RalGAP $\beta$<br>(CG34408) | tgccaagttaagtactttgtgacc | ggaccgcgatgagcaga        | 22                    |
| TD-60 (CG9135)              | cttgcttgctgcaataatc      | atttcgtccttgggctctg      | 45                    |
| Exo84                       | cgacgatttaatttagcgttg    | tgtaggcctcgatttccttt     | 87                    |
| Sec5                        | cgatcaatgagactgccaaga    | acgcatgttccgcttgac       | 50                    |
| Rlip                        | cagatgtctcaccgactaatgg   | gatgttaaagggggcacatactt  | 53                    |
| Act5c                       | accgagcgcggttactct       | cttgatgtcacggacgatttc    | 77                    |
| Atg1                        | CGTCAGCCTGGTCATGGAGTA    | TAACGGTATCCTCGCTGAG      | SYBRgreen             |
| Atg7                        | CGACTCGAAACGCTCCATTA     | ATTCTGTTGTAGCCGTGTAG     | SYBRgreen             |
| Vps34                       | CTCCATCTCAATGTTTCGGCAA   | GCCGTTCTGTGTTTCTTGG      | SYBRgreen             |
| Rab11                       | ATTTGCTCTCACGTTTCACGC    | GCCATCGACCTCTATGCTGC     | SYBRgreen             |
| Ras85D                      | TGCGGGATCAGTATATGCGGA    | GCATCCTTTACGCGCTTGA      | SYBRgreen             |
| Gapdh1                      | TAAATTCGACTCGACTCACGGT   | CTCCACCACATACTCGGCTC     | SYBRgreen             |
