# Supplementary material for: Rala and the exocyst control Pvr trafficking and signaling to ensure lymph gland homeostasis in Drosophila melanogaster
Source: bioRxiv or medRxiv preprint supplement (doi:10.1101/2020.05.26.086140), 2020-05-26
Supplement: Supplementary file [file media-6.pdf]

**Table S5: RNAi efficiency measured as relative mRNA levels in entire lymph glands for all lines tested in this study**

| Hml-Gal4>                 | Stock number (VDRC or BDSC) | mRNA          | housekeeping reference | Mean relative expression (compared to WT) | Relative expression standard deviation |
|---------------------------|-----------------------------|---------------|------------------------|-------------------------------------------|----------------------------------------|
| UAS-RNAi Rala #1          | 43622                       | Rala          | rtgef                  | 0.67                                      | 0.35                                   |
| UAS-RNAi Rala #2          | 105296                      | Rala          | rtgef                  | 0.66                                      | 0.23                                   |
| UAS-RNAi Rala #3          | BL28950                     | Rala          | rtgef                  | 0.74                                      | 0.06                                   |
| UAS-RNAi Rala #4          | BL34375                     | Rala          | rtgef                  | 0.45                                      | 0.05                                   |
| UAS-RNAi Rgl              | 23639                       | Rgl           | rtgef                  | 0.77                                      | 0.10                                   |
| UAS-RNAi Rgl              | 106468                      | Rgl           | rtgef                  | 0.60                                      | 0.22                                   |
| UAS-RNAi Rgl              | BL33389                     | Rgl           | rtgef                  | 1.12                                      | 0.31                                   |
| UAS-RNAi RalGPS/CG5522 #1 | 40595                       | Rgl           | rtgef                  | 1.16                                      | 0.21                                   |
| UAS-RNAi RalGPS/CG5522 #2 | 40596                       | Rgl           | rtgef                  | 1.22                                      | 0.03                                   |
| UAS-RNAi RalGPS/CG5522    | BL31142                     | Rgl           | rtgef                  | 0.56                                      | 0.16                                   |
| UAS-RNAi Rgl              | 23639                       | RalGPS/CG5522 | Act5c                  | 1.27                                      | 0.11                                   |
| UAS-RNAi Rgl              | 106468                      | RalGPS/CG5522 | Act5c                  | 0.18                                      | 0.03                                   |
| UAS-RNAi Rgl              | BL33389                     | RalGPS/CG5522 | Act5c                  | 0.44                                      | 0.03                                   |
| UAS-RNAi RalGPS/CG5522 #1 | 40595                       | RalGPS/CG5522 | Act5c                  | 0.36                                      | 0.05                                   |
| UAS-RNAi RalGPS/CG5522 #2 | 40596                       | RalGPS/CG5522 | Act5c                  | 0.32                                      | 0.07                                   |
| UAS-RNAi RalGPS/CG5522    | BL31142                     | RalGPS/CG5522 | Act5c                  | 0.14                                      | 0.03                                   |
| UAS-RNAi Exo84 #1         | 108650                      | Exo84         | Act5c                  | 0.71                                      | 0.10                                   |
| UAS-RNAi Exo84 #2         | BL28712                     | Exo84         | Act5c                  | 0.47                                      | 0.10                                   |
| UAS-RNAi Exo84 #3         | 30112                       | Exo84         | Act5c                  | 0.67                                      | 0.25                                   |
| UAS-RNAi Sec5 #1          | 28873                       | Exo84         | Act5c                  | 1.35                                      | 0.51                                   |
| UAS-RNAi Sec5 #2          | 28874                       | Exo84         | Act5c                  | 1.23                                      | 0.40                                   |
| UAS-RNAi Sec5 #3          | BL27526                     | Exo84         | Act5c                  | 1.05                                      | 0.52                                   |
| UAS-RNAi Exo84 #1         | 108650                      | Sec5          | Act5c                  | 1.33                                      | 0.20                                   |
| UAS-RNAi Exo84 #2         | BL28712                     | Sec5          | Act5c                  | 0.88                                      | 0.10                                   |
| UAS-RNAi Exo84 #3         | 30112                       | Sec5          | Act5c                  | 1.25                                      | 0.11                                   |
| UAS-RNAi Sec5 #1          | 28873                       | Sec5          | Act5c                  | 0.68                                      | 0.14                                   |
| UAS-RNAi Sec5 #2          | 28874                       | Sec5          | Act5c                  | 1.13                                      | 0.13                                   |

|                          |         |                 |       |      |      |
|--------------------------|---------|-----------------|-------|------|------|
| UAS-RNAi Sec5 #3         | BL27526 | Sec5            | Act5c | 0.60 | 0.11 |
| UAS-RNAi RalGAP $\alpha$ | 22150   | RalGAP $\alpha$ | rtgef | 0.86 | 0.04 |
| UAS-RNAi RalGAP $\alpha$ | 110722  | RalGAP $\alpha$ | rtgef | 1.14 | 0.12 |
| UAS-RNAi RalGAP $\beta$  | 106188  | RalGAP $\alpha$ | rtgef | 1.18 | 0.17 |
| UAS-RNAi RalGAP $\beta$  | 106659  | RalGAP $\alpha$ | rtgef | 1.01 | 0.05 |
| UAS-RNAi RalGAP $\alpha$ | 22150   | RalGAP $\beta$  | rtgef | 1.17 | 0.13 |
| UAS-RNAi RalGAP $\alpha$ | 110722  | RalGAP $\beta$  | rtgef | 1.06 | 0.04 |
| UAS-RNAi RalGAP $\beta$  | 106188  | RalGAP $\beta$  | rtgef | 0.71 | 0.03 |
| UAS-RNAi RalGAP $\beta$  | 106659  | RalGAP $\beta$  | rtgef | 1.13 | 0.05 |
| UAS-RNAi Rlip #1         | 101635  | Rlip            | Act5c | 1.02 | 0.24 |
| UAS-RNAi Rlip #2         | 16244   | Rlip            | Act5c | 0.61 | 0.09 |
| UAS-RNAi Atg1            | BL26731 | Atg1            | gapdh | 0.53 | 0.18 |
| UAS-RNAi Atg7            | BL27707 | Atg7            | gapdh | 0.39 | 0.31 |
| UAS-RNAi Vps34           | 107602  | Vps34           | gapdh | 0.66 | 0.22 |
| UAS-RNAi Rab11           | BL27730 | Rab11           | gapdh | 0.60 | 0.07 |
| UAS-RNAi Exo70 #1        | 27867   | Exo70           | gapdh | 1.13 | 0.20 |
| UAS-RNAi Exo70 #2        | 103717  | Exo70           | gapdh | 0.93 | 0.17 |
| UAS-RNAi Sec10           | BL27483 | Sec10           | gapdh | 0.61 | 0.22 |
